# A ChIP-exo screen of 887 PCR<sup>+</sup> transcription factor antibodies in human cells

William K. M. Lai<sup>1,2</sup>, Luca Mariani<sup>3</sup>, Gerson Rothschild<sup>5</sup>, Edwin R. Smith<sup>6</sup>, Bryan J. Venters<sup>7</sup>, Thomas R. Blanda<sup>1</sup>, Prashant K. Kuntala<sup>1</sup>, Kylie Bocklund<sup>1</sup>, Joshua Mairose<sup>1</sup>, Sarah N Dweikat<sup>1</sup>, Katelyn Mistretta<sup>1</sup>, Matthew J. Rossi<sup>1</sup>, Daniela James<sup>1</sup>, James T. Anderson<sup>3</sup>, Sabrina K. Phanor<sup>3</sup>, Wanwei Zhang<sup>5</sup>, Zibo Zhao<sup>6</sup>, Avani P. Shah<sup>6</sup>, Katherine Novitzky<sup>7</sup>, Eileen McAnarney<sup>7</sup>, Michael-C. Keogh<sup>7\*</sup>, Ali Shilatifard<sup>6\*</sup>, Uttiya Basu<sup>5\*</sup>, Martha L. Bulyk<sup>3,4\*</sup>, B. Franklin Pugh<sup>1,2\*</sup>

<sup>1</sup>Center for Eukaryotic Gene Regulation, Department of Biochemistry and Molecular Biology, The Pennsylvania State University, University Park, Pennsylvania 16802, USA

<sup>2</sup>Department of Molecular Biology and Genetics, Cornell University, Ithaca, NY 14853

<sup>3</sup>Division of Genetics, Department of Medicine; Brigham and Women's Hospital and Harvard Medical School, Boston, MA 02115.

<sup>4</sup>Department of Pathology; Brigham and Women's Hospital and Harvard Medical School, Boston, MA 02115.

<sup>5</sup>Department of Microbiology and Immunology, Vagelos College of Physicians and Surgeons, Columbia University, New York.

<sup>6</sup>Simpson Querrey Center for Epigenetics and the Department of Biochemistry and Molecular Genetics, Northwestern University Feinberg School of Medicine, 303 East Superior Street, Chicago, IL 60611, USA

<sup>7</sup>EpiCypher Inc., Durham NC 27709

\*Co-corresponding authors

## Contact Information:

William KM Lai <wkl29@cornell.edu>

Luca Mariani <lucamariani77@gmail.com>

Gerson Rothschild <ger2@cumc.columbia.edu>

Edwin R. Smith <edwsmith@northwestern.edu>

Bryan J. Venters <bventers@epicypher.com>

Thomas R Blanda <trb5344@psu.edu>

Prashant K Kuntala <pxk284@psu.edu>

Kylie Bocklund <kxb357@psu.edu>

Joshua Mairose <josh.mairose@gmail.com>

Sarah N Dweikat <szd41@psu.edu>

Katelyn Mistretta <katelynmistretta@gmail.com>

Matthew J. Rossi <mjr26@psu.edu>

Daniela James <daniela.james@psu.edu>

41 James T. Anderson <jamesanderson12358@gmail.com>  
42 Sabrina K. Phanor <sphanor@bwh.harvard.edu>  
43 Wanwei Zhang <wz2370@cumc.columbia.edu>  
44 Zibo Zhao <zibo.zhao@northwestern.edu>  
45 Avani P. Shah <avani.shah1@northwestern.edu>  
46 Katherine Novitzky <knovitzky@epicypher.com>  
47 Eileen McAnarney <emcanarney@epicypher.com>  
48 Michael-C. Keogh <mkeogh@epicypher.com>  
49 Ali Shilatifard <ash@northwestern.edu>  
50 Uttiya Basu <ub2121@cumc.columbia.edu>  
51 Martha L. Bulyk <mlbulyk@genetics.med.harvard.edu>  
52 B. Franklin Pugh <fp265@cornell.edu>  
53

## 54 **Abstract**

55       Antibodies offer a powerful means to interrogate specific proteins in a complex milieu.  
56       However, antibody availability and reliability are problematic and epitope tagging can be  
57       impractical in many cases. In an effort to improve this situation, the Protein Capture Reagents  
58       Program (PCRP) generated over a thousand renewable monoclonal antibodies (mAbs) against  
59       human-presumptive chromatin proteins. However, these reagents have not been widely field-  
60       tested. We therefore performed a screen to test their ability to enrich genomic regions via  
61       chromatin immunoprecipitation (ChIP) and a variety of orthogonal assays. 887 unique antibodies  
62       against 681 unique human transcription factors (TFs), were assayed by ultra-high resolution  
63       ChIP-exo/seq, primarily in a single pass in one cell type (K562). Deep systematic analyses of the  
64       resulting ~1,200 ChIP-exo datasets can be found at [www.PCRPvalidation.org](http://www.PCRPvalidation.org). Subsets of PCRP  
65       mAbs were further tested in ChIP-seq, CUT&RUN, STORM super-resolution microscopy,  
66       immunoblots, and protein binding microarray (PBM) experiments. About 5% of the tested  
67       antibodies displayed target (i.e., cognate antigen) enrichment across at least one assay and are  
68       strong candidates for additional validation. An additional 34% produced ChIP-exo data that was  
69       distinct from background and thus warrant further testing. The remaining 61% were not  
70       substantially different from background, and likely require consideration of a much broader  
71       survey of cell types and/or assay optimizations. We demonstrate and discuss the metrics and  
72       challenges to antibody validation in chromatin-based assays.

## 74 **Introduction**

75       Antibodies are a critical component of a wide variety of biochemical assays. They serve  
76       as protein-specific affinity-capture and detection reagents, useful *in vivo* and *in vitro*. Example  
77       assays include chromatin immunoprecipitation (ChIP) of protein-DNA interactions,  
78       immunofluorescence, immunoblotting, ELISA, purification of cells and proteins, protein binding  
79       microarray (PBM) experiments, and targeted *in vivo* delivery of effector molecules (Chames et  
80       al. 2009; Park 2009; Siggers et al. 2011a; Mahmood and Yang 2012; Engelen et al. 2015; Lin et  
81       al. 2015). One advantage of target-specific antibodies is their ability to recognize proteins  
82       without the need for an engineered affinity tag. The human proteome contains tens of thousands  
83       of distinct proteins, each requiring a different antibody for specific detection. The usage of a  
84       variety of antibodies to diverse targets has been a critical component of NIH-funded consortium  
85       projects such as the ENCODE and Roadmap Epigenomics Mapping (Consortium 2012;  
86       Roadmap Epigenomics et al. 2015). However, broad profiling of the genomic targets of human  
87       sequence-specific transcription factors (ssTFs) has been limited by the availability of ‘ChIP-  
88       grade’ antibodies.

89       Overall, there has been an acute lack of antibodies that effectively distinguish the many  
90       thousands of different chromatin proteins. Consistency in reagent production and performance  
91       have been particularly problematic (Egelhofer et al. 2011; Baker 2015; Shah et al. 2018).  
92       Polyclonal antibodies, being a mixed product of many antibody genes, have the advantage of  
93       potentially recognizing multiple epitopes on a protein, thereby producing robust target detection  
94       (Hanly et al. 1995). However, their production is finite, and can be variable across immunized

95 animals, but also vary within individuals by different bleed dates and affinity purifications.  
96 These factors and more hamper reproducibility (Reardon 2016).

97 The NIH Protein Capture Reagent Program (PCRP) was initiated through the NIH  
98 Common Fund with the stated goal of testing the feasibility of producing low-cost, renewable,  
99 and reliable protein affinity reagents in a manner that can be scaled ultimately to the entire  
100 human proteome (PA-16-287) (<https://proteincapture.org/>) (Blackshaw et al. 2016). With an  
101 initial focus on putative ssTFs, this endeavor reported the production of 1,406 mouse monoclonal  
102 antibodies (mAbs) against 737 chromatin protein targets (Venkataraman et al. 2018). This  
103 included two parallel production approaches: mouse hybridomas that release mAb into growth  
104 medium supernatant, and recombinant antibodies produced in *E. coli*. The advantages of these  
105 two approaches over polyclonal antibodies are, in principle, a renewable and consistent supply of  
106 homogeneous preparations produced from a single set of genes that recognize a single epitope  
107 (Kohler and Milstein 1975; Winter et al. 1994; Liu 2014). To accommodate the potential  
108 shortcoming of a hybridoma recognizing a single non-viable epitope, the NIH PCRP made an  
109 effort to generate at least two independent clones for each target, although this does not  
110 guarantee two different epitopes, as in cases where there are immunodominant regions.

111 Antibody validation is required to generate confidence in their utility (Baker 2015; Marx  
112 2019). Validation exists at many levels ranging from whether an antibody specifically recognizes  
113 its intended target to the exclusion of all others, to whether it consistently performs successfully  
114 in a particular assay (Landt et al. 2012; Wardle and Tan 2015; Uhlen et al. 2016; Edfors et al.  
115 2018; Sikorski et al. 2018). Each publicly available PCRP-generated antibody was previously  
116 validated for its target recognition by *in vitro* human protein (HuProt) microarray screening  
117 (Venkataraman et al. 2018). These arrays contain approximately equivalent amounts of antigen,  
118 which differs from the wide expression range in natural sources. They also may differ in epitope  
119 accessibility compared to complexed or crosslinked targets in ChIP assays. Thus, additional  
120 assay-specific validation is necessary. The further capability of PCRP antibodies has been  
121 described for a limited set in a number of approaches, including immunoblotting,  
122 immunoprecipitation, immunohistochemistry, and ChIP-seq, with assay-dependent success  
123 observed (Venkataraman et al. 2018). Previous work has reported that 46 of 305 mAbs against  
124 36 of 176 targets passed ENCODE ChIP-seq standards (Venkataraman et al. 2018), although  
125 detailed supporting evidence is not publicly available. “Browser shots” of selected loci from that  
126 study are available for ~40 datasets against 31 targets. However, these should be considered  
127 preliminary, since locus-specific examples lack statistical power and unbiased selection.  
128 Additionally, chromatin fragmentation and extraction may generate localized variation in yield  
129 that varies from prep to prep (active promoters, enhancers, etc.). Numerous replicates (target and  
130 control) are often needed to ensure against false positives at selected individual loci due to  
131 sampling variation and multiple hypothesis testing. As broader community use of the PCRP-  
132 generated antibodies will likely benefit from a wider survey, we conducted additional tests of  
133 these reagents. To our knowledge there has been no systematic large-scale field assessment of  
134 antibodies in ChIP. We report on progress and challenges in comprehensively assaying ~1,400  
135 PCRP mAbs. As this represents a first-pass assessment, most experiments include only a single  
136 replicate, using enrichment of specific genomic features as preliminary evidence of success. We

137 performed replicates on some samples that displayed enrichment (e.g., expected motif  
138 enrichment) as well as a subset of samples which displayed no initial enrichment to examine our  
139 true negative rate.

140 Since evaluating each of ~1,400 mAbs in a wide variety of assays was not practical, we  
141 opted for broad coverage by ChIP-exo, which we have developed into a high-throughput and  
142 ultra-high resolution alternative to ChIP-seq (Rossi et al. 2018). ChIP-exo allows genome-wide  
143 detection of chromatin interactions at near-bp resolution, which also increases the confidence of  
144 peak calling. We further tested a smaller subset of mAbs in other assays (ChIP-seq, CUT&RUN,  
145 super-resolution cellular microscopy (STORM), immunoblots, and protein binding microarrays).  
146 These additional tests were not intended to be comprehensive, but rather to evaluate the  
147 challenges and practicality of systematic antibody validation. Overall, we tested 946 unique mAb  
148 clones (887 in ChIP-exo and 59 in other assays), of which 642 targeted putative ssTFs, which  
149 allowed computational comparison through the enrichment of their cognate motifs (if one exists).  
150 The antibodies and assays were chosen to cover a wide range of end-user applications, with  
151 specific ssTFs chosen in part based on the scientific interests of the investigators and a set of  
152 objective criteria. With a deep dive on a single assay (ChIP-exo), we explored end-user practical  
153 issues related to antibody sourcing, reproducibility and validation metrics, and specificity for cell  
154 types and states.

155

## 156 **Results**

### 157 **Screening PCRP mAb by ChIP-exo**

158 We used the massively parallel ChIP-exo version of ChIP-seq to screen PCRP Abs in 96-  
159 well plate format (48 at a time) for their ability to recognize their putative protein targets in a  
160 chromatinized, cellular context (Rhee and Pugh 2012; Rossi et al. 2018). Briefly, proteins were  
161 formaldehyde crosslinked to DNA and each other within cells. Chromatin was then isolated,  
162 fragmented, and immunoprecipitated. While on the beads, the fragmented DNA was trimmed  
163 with a strand-specific 5'-3' exonuclease up to the point of crosslinking (i.e., protection), which  
164 was then mapped by DNA sequencing. For many proteins, this provides single-bp resolution in  
165 genome-wide detection (Rhee and Pugh 2011). Since ChIP-exo is a higher resolution derivative  
166 of ChIP-seq, ChIP-exo is expected in principle to detect any real binding events that ChIP-seq  
167 detects, and likely more due to its higher dynamic range.

168 Technical reproducibility of ChIP-exo with PCRP mAbs was evaluated with 43  
169 independent replicates performed on the sequence-specific TF USF1. This replicate served as a  
170 positive control in 43 cohorts, each having 46 mAb assayed on different days: as such no USF1  
171 replicates were excluded in this analysis. We prioritized mAb evaluation in K562 (human bone  
172 marrow lymphoblast), but also tested a subset in MCF7 (human mammary gland epithelial),  
173 HepG2 (human liver, epithelial-like), and donated human tissues (liver, kidney, placenta, and  
174 breast). From this and IgG (or no antibody) negative controls, we defined with USF1 a set of  
175 ~164,000 E-box motif instances associated with a significant ( $q < 0.01$ ) peak-pair in at least one  
176 replicate ChIP-exo experiment (Albert et al. 2008). This reflects a very relaxed criterion, with a  
177 high level of expected false positives, for the purposes of evaluating the gradient from true  
178 binding through nonspecific background at genomic E-boxes. The latter is expected where a

179 peak location occurred in only a small fraction of datasets. When examined at greater stringency  
180 regarding the number of replicates in which the same peak was found, a higher average  
181 occupancy and more robust patterning was observed. Of the USF1 datasets, 43 of the 45 (>95%),  
182 produced a USF1-specific ChIP-exo pattern around E-boxes (*Supplementary Fig. 1A*, vertical  
183 blue and red stripes in the heat maps and single-bp peaks in the composite plots). A Pearson-  
184 pairwise correlation was calculated for the occupancy of binding at putative USF1-bound E-  
185 boxes across all USF1 and negative control IgG (or no antibody) ChIP datasets (*Supplementary*  
186 *Fig. 1B*). A strong correlation among USF1 data sets was observed, which reflects a high level of  
187 reproducibility and indicated that ChIP-exo was suitable for screening and evaluating PCR  
188 mAbs in ChIP.

189 We initiated our ChIP mAb survey by first considering the practicality of producing a  
190 large number of antibody preparations from *E. coli* or mouse hybridomas. Purification from *E.*  
191 *coli* included transformation of expressing plasmids, cell growth, recombinant protein induction,  
192 and purification. After multiple attempts, we determined that high throughput parallelized  
193 recombinant immunoreagent production was not practical within the scope of this project, due to  
194 a need to optimize the protocol in our hands. We therefore opted to pursue commercially  
195 available hybridoma-based mAbs.

196

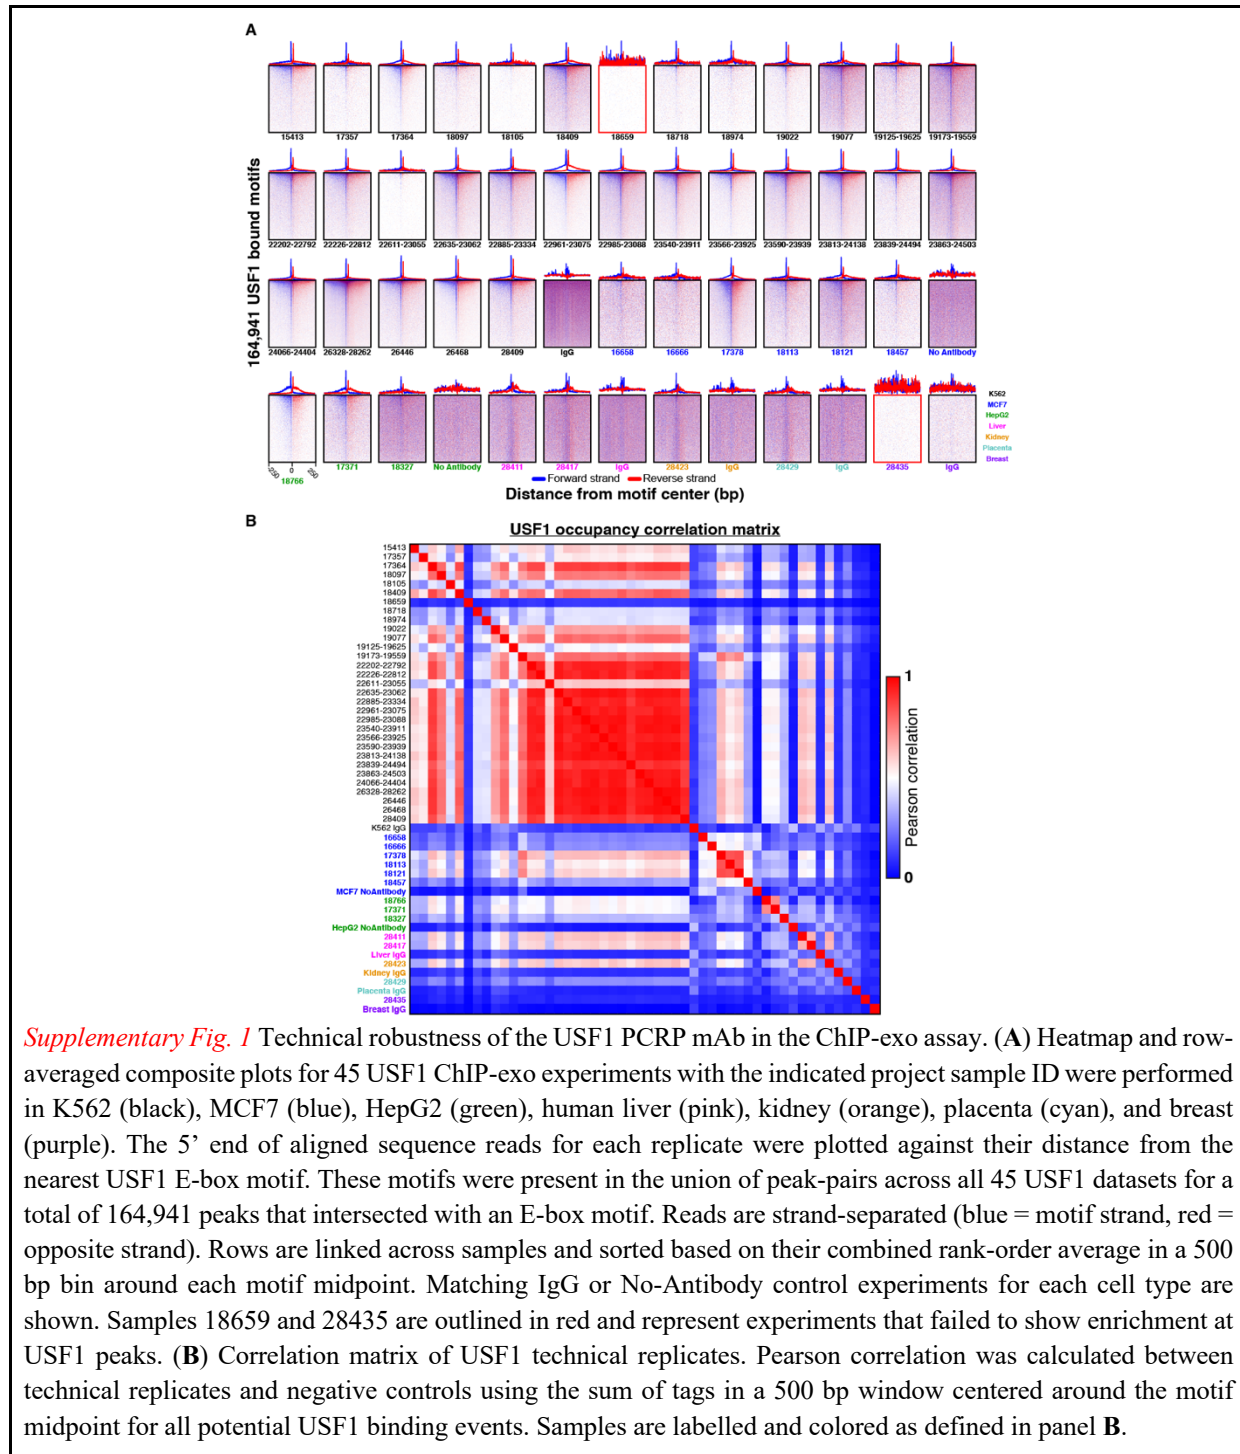

197  
198  
199  
200  
201  
202  
203

We first examined vendor source. We tested NRF1, USF1, and YY1 PCRp mAb from DSHB and CDI. The former was supplied as hybridoma culture supernatants (10-80 ug/ml antibody), and the latter as concentrates (*Supplementary Fig. 2*). Each preparation (as supplied) was pre-loaded onto protein A/G magnetic beads. In general, we found that while mAbs from both sources (assayed at the same reported mAb amounts; 3 ug) specifically detect NRF1 and USF1, DSHB-derived hybridoma culture supernatants detected more binding events at cognate

204 motifs compared to CDI concentrates. We therefore sourced from DSHB for the remainder of  
205 this study. Nevertheless, mAbs from CDI may be improved through further optimizations.  
206

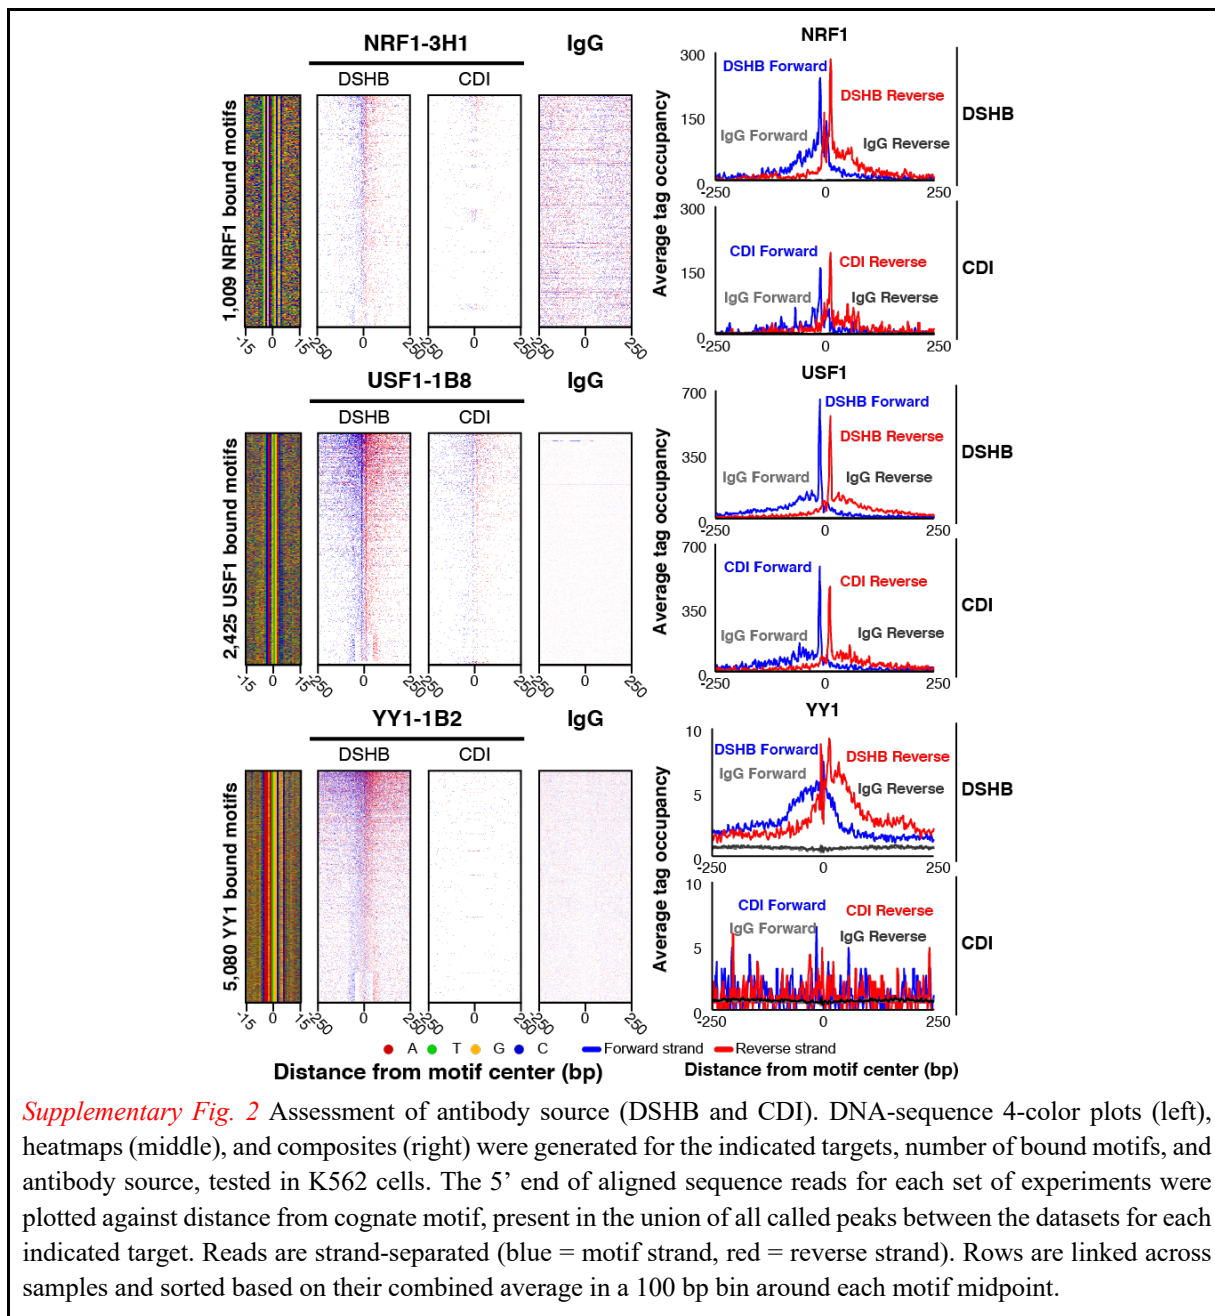

207  
208 We assayed all 887 available hybridoma supernatants containing mAbs to 681 non-  
209 redundant targets. Testing was initially performed in K562 (1,009 datasets), although a subset of  
210 hybridoma supernatants were tested in MCF7 (134 datasets) and HepG2 (96 datasets) cells,  
211 based on reported target mRNA expression levels. If there was no substantial difference in ssTF  
212 expression level, or the ssTF was not measurably expressed in any of these three lines, testing  
213 defaulted to K562 due to practical considerations including the ability to grow this line at scale  
214 (liquid culture) (*Supplementary Fig. 3A*). 245 unique hybridoma clones were assayed in replicate



215 at least twice in the same or different cell types, resulting in 1,261 datasets (*Supplementary Fig.*  
 216 *3B*). Of these 245 hybridoma clones, 36 (14.7%) showed enrichment of the same class of  
 217 genomic features. 102 (41.6%) of the mAb clones produced no enrichment of genomic features  
 218 in both replicates, and 107 (43.7%) produced enrichment in one sample but not in the other  
 219 (*Supplementary Table 1*). The latter may be due to being at the limits of detection. We next set  
 220 out to characterize certain mAb in more depth.  
 221

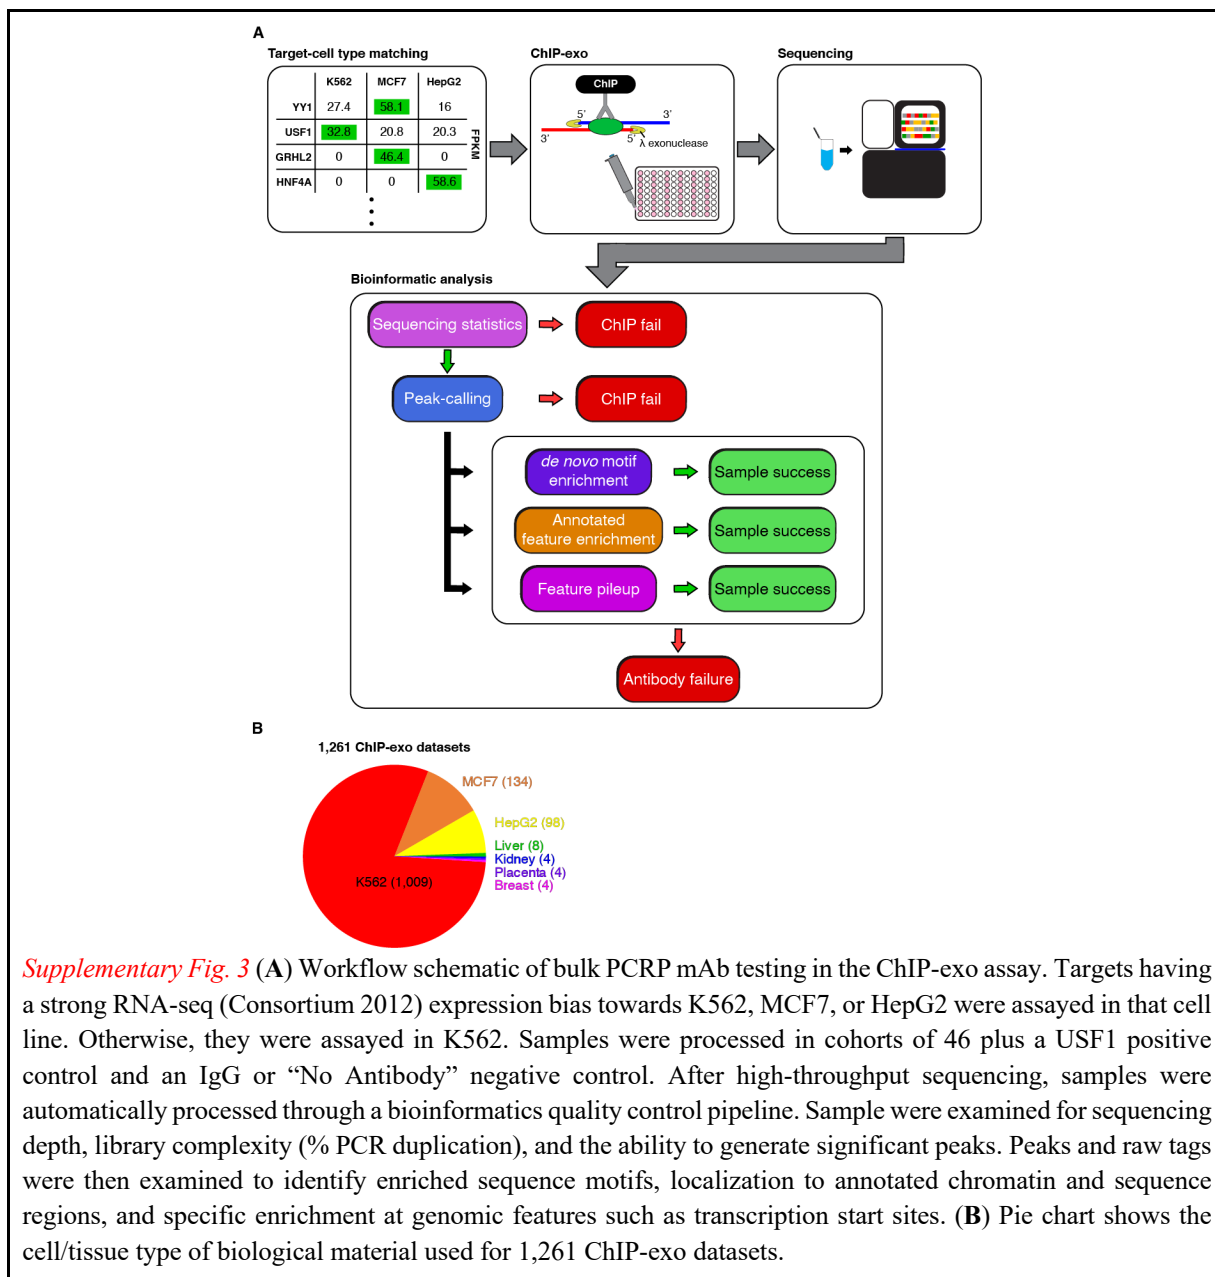

222  
 223 As exemplified by NRF1, USF1, YY1, and an IgG negative control (**Figure 1A**), the  
 224 finding that ChIP-exo peaks were enriched at a very precise distance from cognate motifs  
 225 provided strong support for specificity in target detection. We also compared different  
 226 hybridoma clones against the same target, as exemplified by heat shock factor 1 (HSF1).

227 Hybridoma clones potentially target different epitopes, although immunodominance may yield  
228 independent clones to the same epitope. Both HSF1 mAbs gave nearly identical ChIP-exo read  
229 patterns around the same set of features (heat shock elements, **Figure 1B**, clones 1A10 and 1A8),  
230 thereby demonstrating reproducibility of ChIP-exo profiles across independent PCRPs mAbs.  
231 This is particularly important where validation criteria by motif enrichment are not applicable.  
232 However, two other HSF1 mAb clones failed (**Figure 1B**, clones 1C1 and 1D11), indicating that  
233 independent PCRPs clones can have different capabilities in ChIP. Therefore, if one mAb clone  
234 fails, it may be productive to check others.

235 Targets that interact with each other or with the same sites may also provide a useful  
236 validation criterion for determining enrichment specificity. For example, in the case of USF1 and  
237 USF2 interaction partners and homologs (Rada-Iglesias et al. 2008), the USF1-1B8 and USF2-  
238 1A11 mAbs detected binding at the same sites (**Figure 1C**). However, in this particular case we  
239 cannot exclude cross-reactivity of the mAb with the two homologous USF1/2 proteins (always a  
240 potential concern with target-specific antibodies). Additional validation criteria may include  
241 comparisons to public-domain ChIP-seq datasets that use different antibodies (*e.g.*, ENCODE, as  
242 in *Supplementary Fig. 4*).

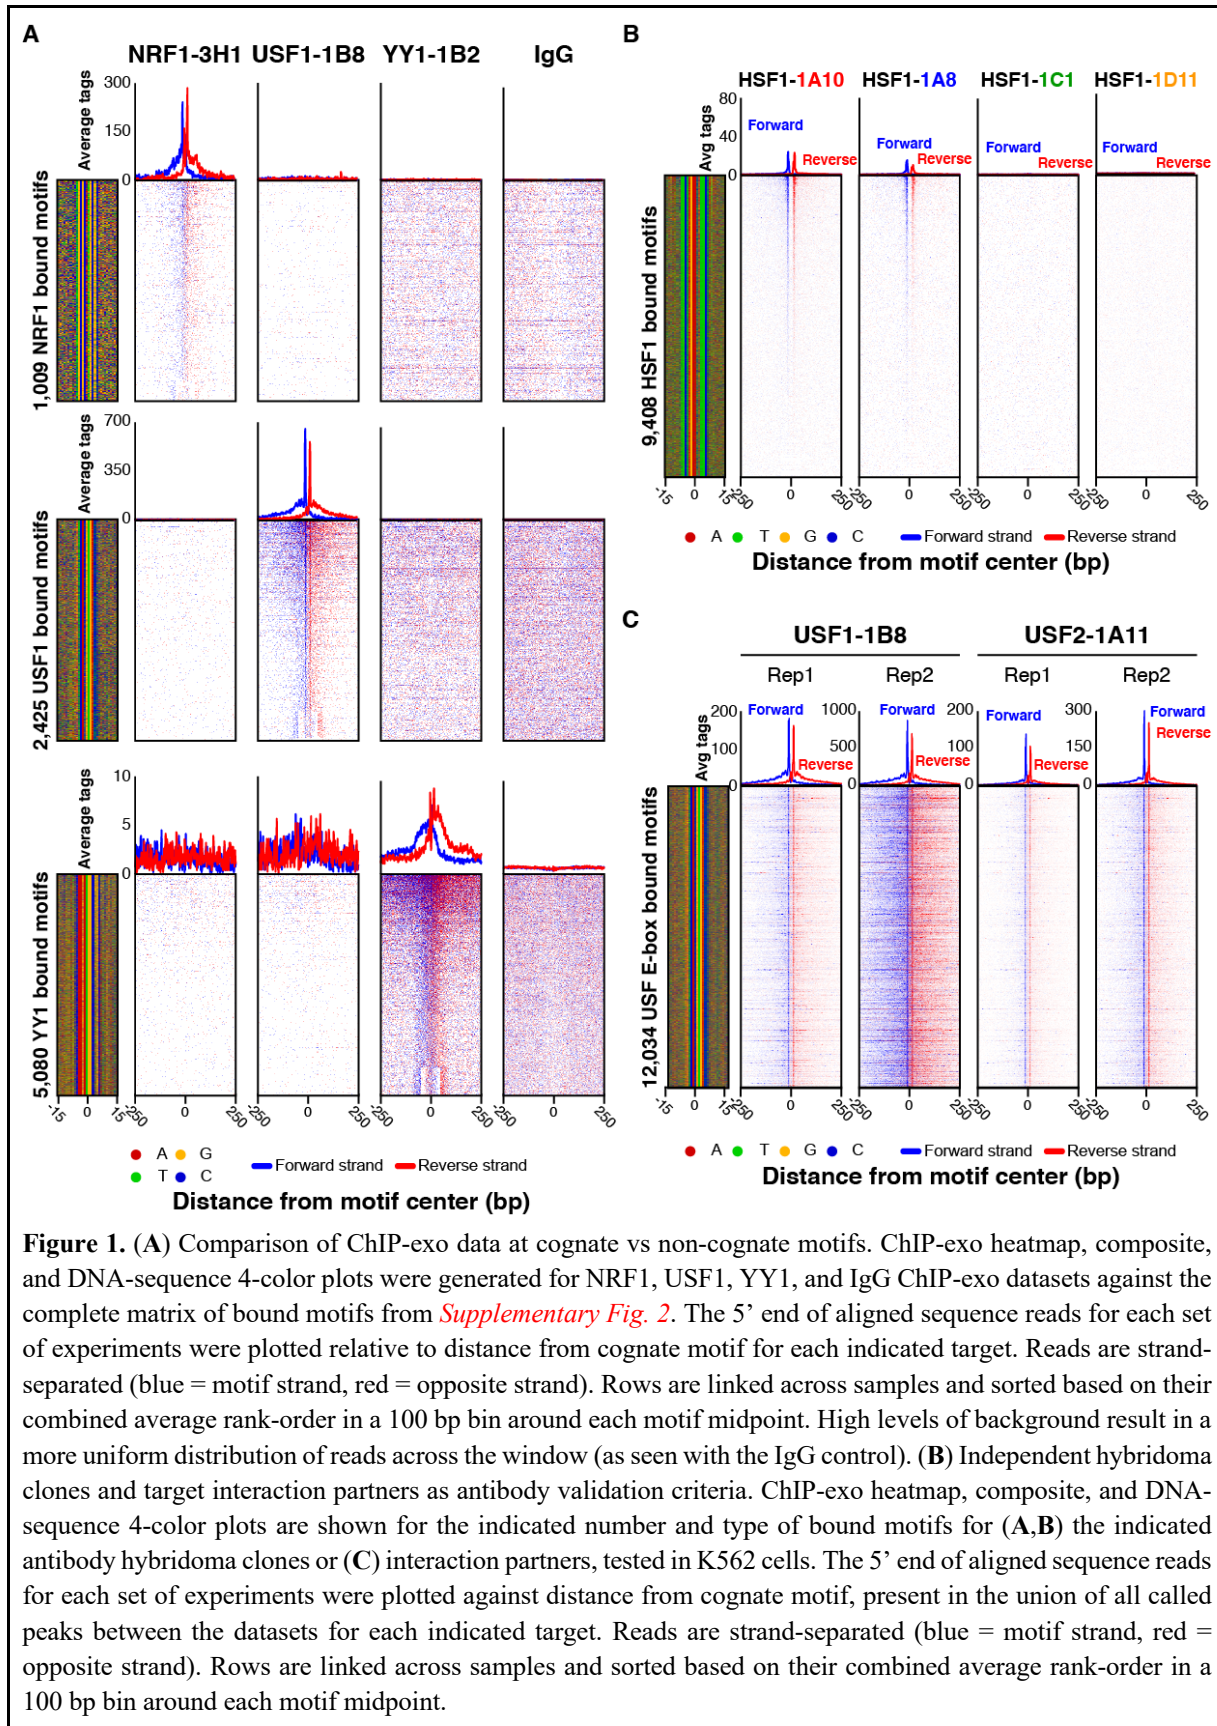

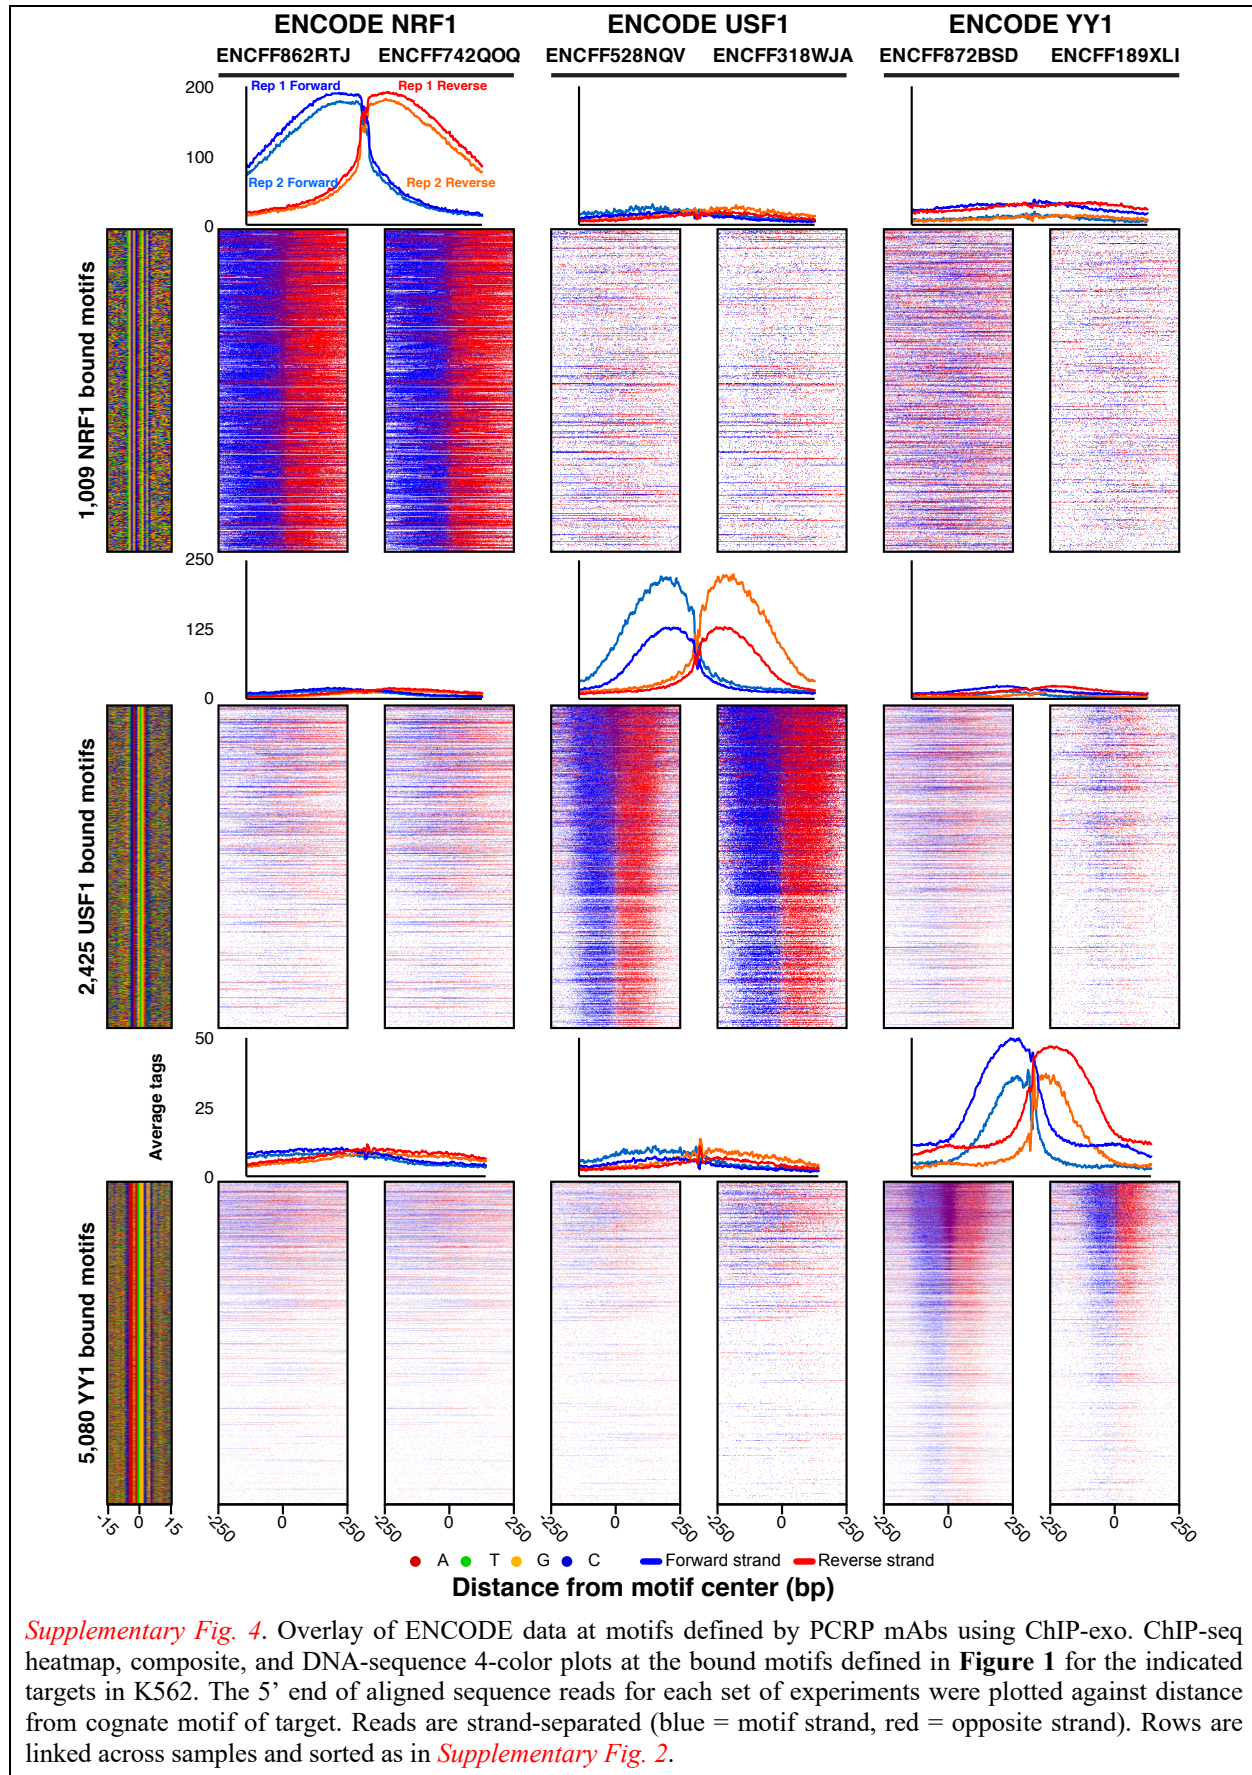

## 244 **Assessment by ChIP-seq**

245 Since ChIP-seq is a widely used assay (and related to ChIP-exo), we performed ChIP-seq  
246 (in HCT116 cells) with 137 PCRPs hybridomas corresponding to 70 targets associated with  
247 chromatin binding, modification, enhancer function, and/or transcriptional elongation. We found  
248 19 (14%) produced significantly enriched peaks (see Methods) (*Supplementary Table 2*).  
249 However, these single-replicate datasets were not checked for enrichment of specific classes of  
250 genomic features. Stringent validation for antibody-specificity involves knocking down a target,  
251 then observing a reduction of assayed signal relative to a mock knockdown (Wardle and Tan  
252 2015; Uhlen et al. 2016; Edfors et al. 2018). We examined the feasibility of this starting with one  
253 target, NRF1. NRF1 expression was knocked down in HCT116 cells by RNAi. NRF1 peaks  
254 were concomitantly diminished with two different specific oligos, but not by an untargeted oligo  
255 (**Figure 2A**), thereby demonstrating specificity of the PCRPs mAbs 3D4 and 3H1 for this target.  
256 We further confirmed specific knockdown of NRF1 by immunoblot (**Figure 2B**). Due to the  
257 relatively high cost and current limitations in knock-down technologies, we found it was not  
258 practical within the scope of this project to conduct systematic knockdowns across the PCRPs  
259 mAb collection. Furthermore, knockdown validation may not provide the level of validation  
260 stringency in ChIP that it does for immunoblots. Knockdown of proteins can cause widespread  
261 indirect effects on the binding of other protein-complexes which could in turn skew the ChIP-  
262 signal in aberrant ways (Trescher and Leser 2019).

263 Two mAbs (FOS-1A7 and SMAD2-1B10) gave unexpected ChIP-seq patterns for their  
264 intended targets; namely enrichment at transcription start sites (TSS in **Figure 2C**). Previous  
265 studies have shown SMAD2 and FOS binding predominately occurs within active enhancers and  
266 not at TSS (Aragon et al. 2019; Su et al. 2020). However, both ChIP-seq and ChIP-exo showed  
267 enrichment at TSSs and not at predicted (chromHMM) enhancers (see also online data). Deeper  
268 biochemical validation will be needed to verify the specificity of these mAbs.

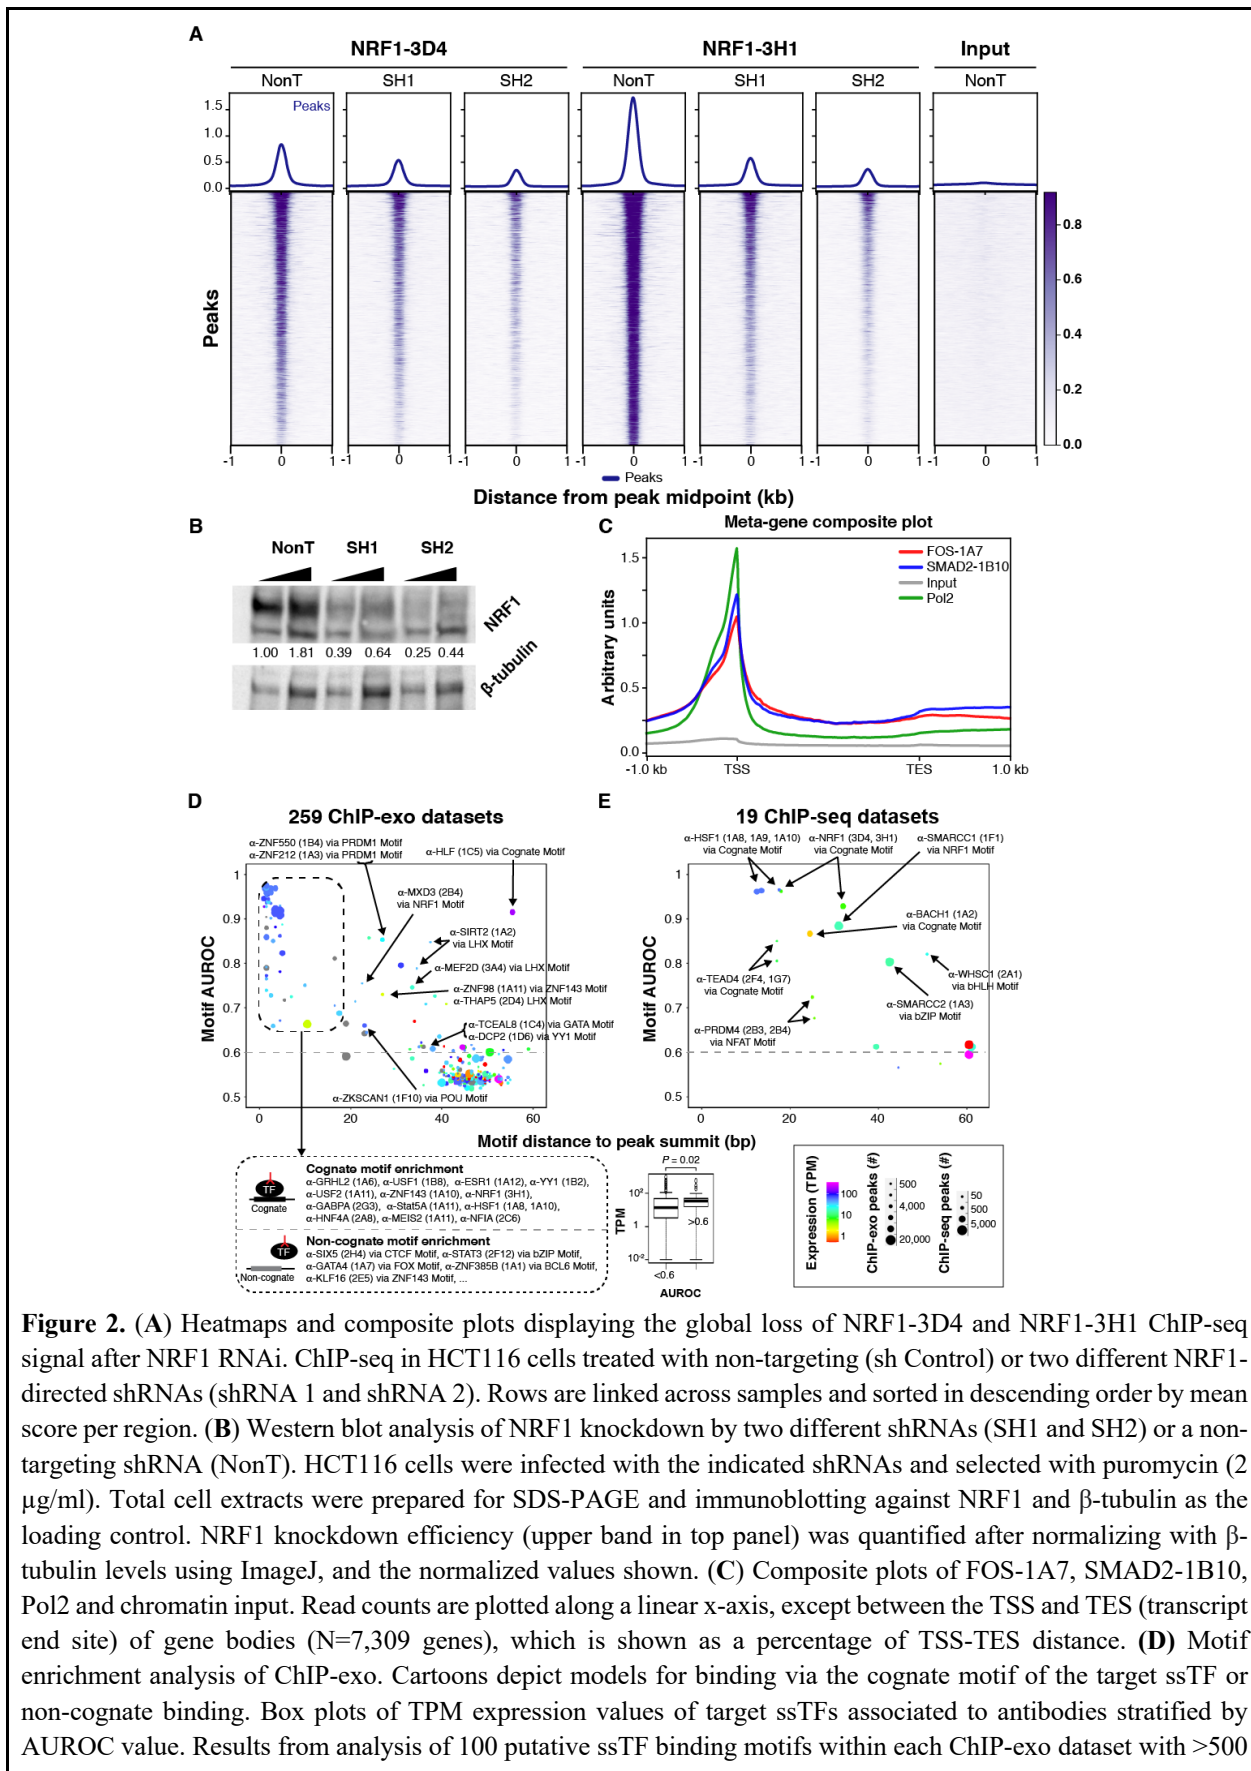

peaks (259 datasets in total). We assigned to each ChIP-exo dataset the PWM with the highest AUROC (“Top Motif”) and quantified its centering as the mean distance of the PWM match from the peak’s summit. In the scatter plot, each point represents the enrichment/centering of the top motif in one of the 259 putative TF ChIP-exo datasets. Colors indicate the expression level (RNA-seq TPM value (Consortium 2012); unavailable values are shown in gray) of the gene specific for the antibody used in the ChIP assay. Point sizes indicate the number of ChIP-exo peaks in the dataset. Top motifs with AUROC >0.6 (dashed line) and TPM values from duplicate RNA-seq experiments are indicated. (E) Results from enrichment analysis of 100 TF binding motifs within each of 19 ChIP-seq datasets. Points are formatted as in (D).

269

## 270 **Assessment through feature enrichment**

271 Thus far we have established the utility of three independent validation criteria inherent  
272 to ChIP-exo analysis: 1) enrichment and patterning at a cognate motif (**Figure 1A**); 2)  
273 correlation with an independent mAb clone (**Figure 1B**); and 3) co-localization with an  
274 interacting partner (**Figure 1C**). In our large-scale evaluation of mAbs, these validation criteria  
275 often were either not applicable or not attainable. We therefore looked for additional criteria that  
276 might be useful where the preferred validation criteria were inconclusive. We used the ChExMix  
277 algorithm to identify significant modes of protein binding and *de novo* motif detection through a  
278 combination of DNA sequence enrichment and variation in ChIP-exo patterning (Yamada et al.  
279 2019). Discovered motifs were identified using TOMTOM and the JASPAR database (Gupta et  
280 al. 2007; Fornes et al. 2020). Next, their relative enrichment in annotated genomic regions (e.g.,  
281 promoters, enhancers, and insulators) was quantified. Enrichment may be suggestive of function.  
282 These included chromHMM and Segway genome segmentations (*Supplementary Fig. 3A*)  
283 (Hoffman et al. 2013).

284 We also considered a low stringency test that did not require statistical enrichment of  
285 peaks (useful for low coverage). Composite plots were generated around well-defined general  
286 features like transcription start sites and CTCF binding sites and the average tag enrichment was  
287 examined relative to a negative control (IgG) background. We caution that any enrichments for  
288 particular targets relative to these features should be followed up with additional replicates. Test  
289 results for all validation criteria and other analyses for each tested antibody can be found at  
290 [www.PCRPvalidation.org](http://www.PCRPvalidation.org) and *Supplementary Table 1*. The website provides a deep and rich  
291 resource for preliminary discovery for each target, particularly since the vast majority of targets  
292 remain uncharacterized (at all, or in the manner(s) we have performed). We caution that the  
293 website provides automated analysis for all datasets, including those that did not pass our  
294 significance thresholds and/or were not replicated independently. Some of these may simply  
295 reflect non-optimized ChIP conditions (e.g., antibody amounts and/or cell type). These additional  
296 analyses generally offered less confidence compared to *a priori* cognate motif validation because  
297 many of the defined chromatin states are relatively abundant in the genome. The analyses should  
298 serve only as a reference point for additional characterization and optimization, and not used to  
299 draw biological conclusions.

300

## 301 **Evaluation through motif analysis**

302 To further evaluate the ChIP-exo and ChIP-seq data for evidence of ssTF genomic  
303 occupancy (direct or indirect), we analyzed 259 ChIP-exo and 19 ChIP-seq peak files for ssTF  
304 motif enrichment by using an Area Under the Receiving Operator Characteristics curve  
305 (AUROC) metric in which ChIP ‘bound’ regions are compared to a background set of unbound  
306 sequences. Briefly, the AUROC assesses the enrichment of matches to a given TF motif among  
307 the ChIP ‘bound’ regions as compared to a background set of unbound regions; the resulting  
308 AUROC value ranges from 0 to 1, with 0.5 corresponding to that expected at random. In addition  
309 to AUROC motif enrichment, we also quantified the distance of the motif to the peak summit,  
310 which is expected to be shorter for motifs recruiting the profiled ssTF to the DNA (either directly  
311 or through a tethering ssTF partner) (Gordan et al. 2009; Bailey and Machanick 2012; Wang et  
312 al. 2012; Mariani et al. 2017) (**Figure 2C,D**). We used a collection of 100 non-redundant  
313 position weight matrices (PWMs) representative of the known repertoire of human ssTF binding  
314 specificity (Bailey and Machanick 2012). These approaches identified 20 PCRPs antibodies,  
315 corresponding to 16 putative ssTFs, for which their cognate DNA motif was both enriched and  
316 centered within the ChIP peaks (“Direct Binding” in *Supplementary Table 3*). Possible reasons  
317 for the remaining datasets not showing significant motif enrichment include (but are not limited  
318 to): (i) the target TF was not expressed at sufficiently high levels or at sufficiently high nuclear  
319 concentrations in the assayed cells, (ii) the epitope recognized by the antibody was not accessible  
320 in the chromatin context in the assayed cells, (iii) the target TF was not occupying specific  
321 genomic target sites (either directly or indirectly) in the assayed cells, or (iv) off-target  
322 recognition by the antibody of other proteins in the assayed cells, resulting in lack of sufficient  
323 enrichment of the intended target TF.

324 Of the analyzed datasets, an additional 30 PCRPs mAbs showed enrichment for a binding  
325 motif other than the cognate motif of the ChIP-profiled ssTF (**Figure 2C,D**). The enrichment of  
326 a non-cognate motif suggests that the genomic occupancy of the ChIP-profiled ssTF might be  
327 mediated through indirect binding by a different ssTF (Wang et al. 2012; Mariani et al. 2017),  
328 which is bound directly to those ChIP ‘bound’ genomic sites through the enriched motif  
329 (“Indirect Binding” in *Supplementary Table 3*). In this way, we have previously identified  
330 indirect binding modes from ChIP-chip or ChIP-seq experiments that used traditionally prepared  
331 antibodies against either an epitope tag on yeast ssTFs or human ssTFs (Gordan et al. 2009;  
332 Mariani et al. 2017). Here, for example, the NFAT motifs was enriched and centered among  
333 ChIP-seq peaks resulting from ChIP-seq experiments using two different anti-PRDM4 PCRPs  
334 antibody clones (2B3 and 2B4), suggesting that in HCT116 cells PRDM4 binds DNA indirectly  
335 via an NFAT factor. As none of the indirect binding modes that we inferred in this study have  
336 been described previously to our knowledge, future experiments are needed to verify them and to  
337 rule out the alternative possibility that the antibody may preferentially cross-react with a TF  
338 whose motif was found enriched.

339

### 340 **ChIP assessment in multiple cell states and types**

341 Any number of targets may be sequestered in a state that prevents their interaction with  
342 chromatin (and thus detection by ChIP) unless activated to do so through a change in cell state.  
343 We examined this with HSF1, which is rapidly induced to bind in the nucleus upon heat shock to



344 activate heat shock response genes (Baler et al. 1993). HSF1 was bound to cognate motifs at  
 345 relatively low levels under non-stressed conditions but increased in binding upon treatment of  
 346 cells with hydrogen peroxide (0.3 mM) for 3 min and 30 min. (*Supplementary Fig. 5A*, assayed  
 347 by ChIP-exo), or upon heat shock (shift from 37°C to 42°C for 1 hr) (*Supplementary Fig. 5B*,  
 348 assayed by ChIP-seq). This illustrates a potential problem with using mRNA expression levels as  
 349 a basis for expecting a factor to be actively bound to chromatin. Many TFs are sequestered and  
 350 only bind chromatin when released by signaling events.  
 351

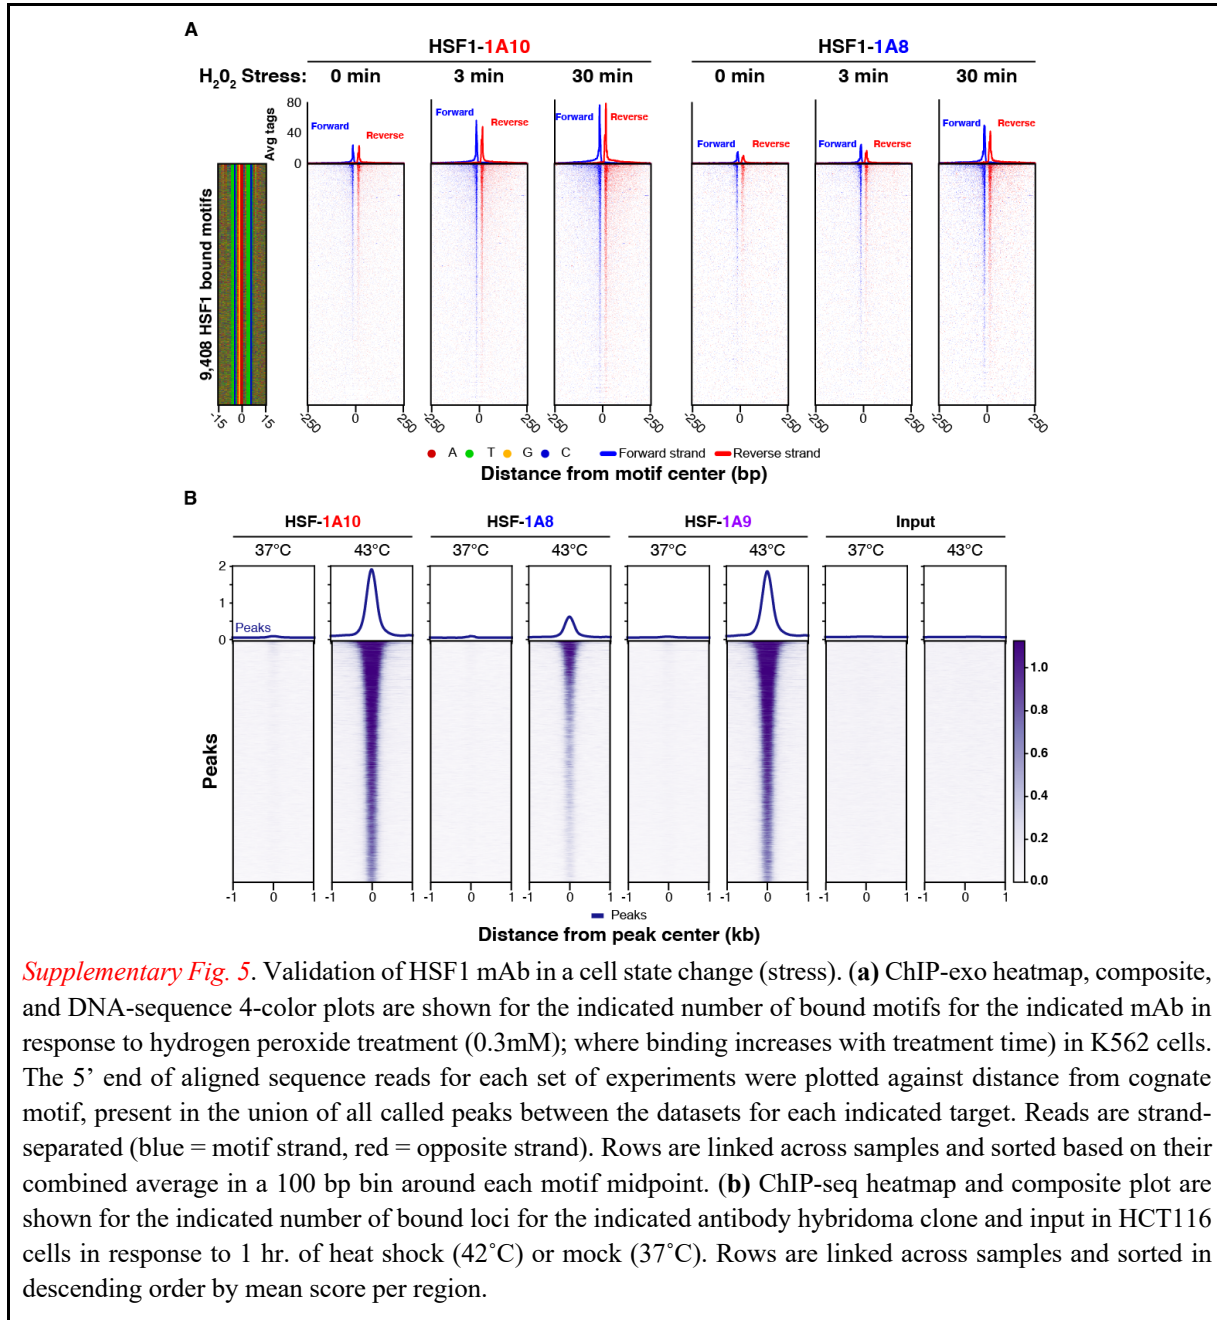

352 While ChIP-exo antibody assessments were primarily performed in K562 cells (see  
 353 above), many targets may have chromatin interactions that are cell-type specific. An example of  
 354 cell-type specific expression was observed with the breast cancer factor GRHL2, where binding

355 was detected in MCF7 cells but not in other cell types (**Figure 3A**). Other targets like USF1 and  
 356 NRF1 were less cell type-specific, although we do not exclude selectivity at subsets of sites  
 357 (**Figure 3B**). Therefore, testing antibodies in the appropriate cell type (with appropriate signaling  
 358 events) may be critical for target detection.

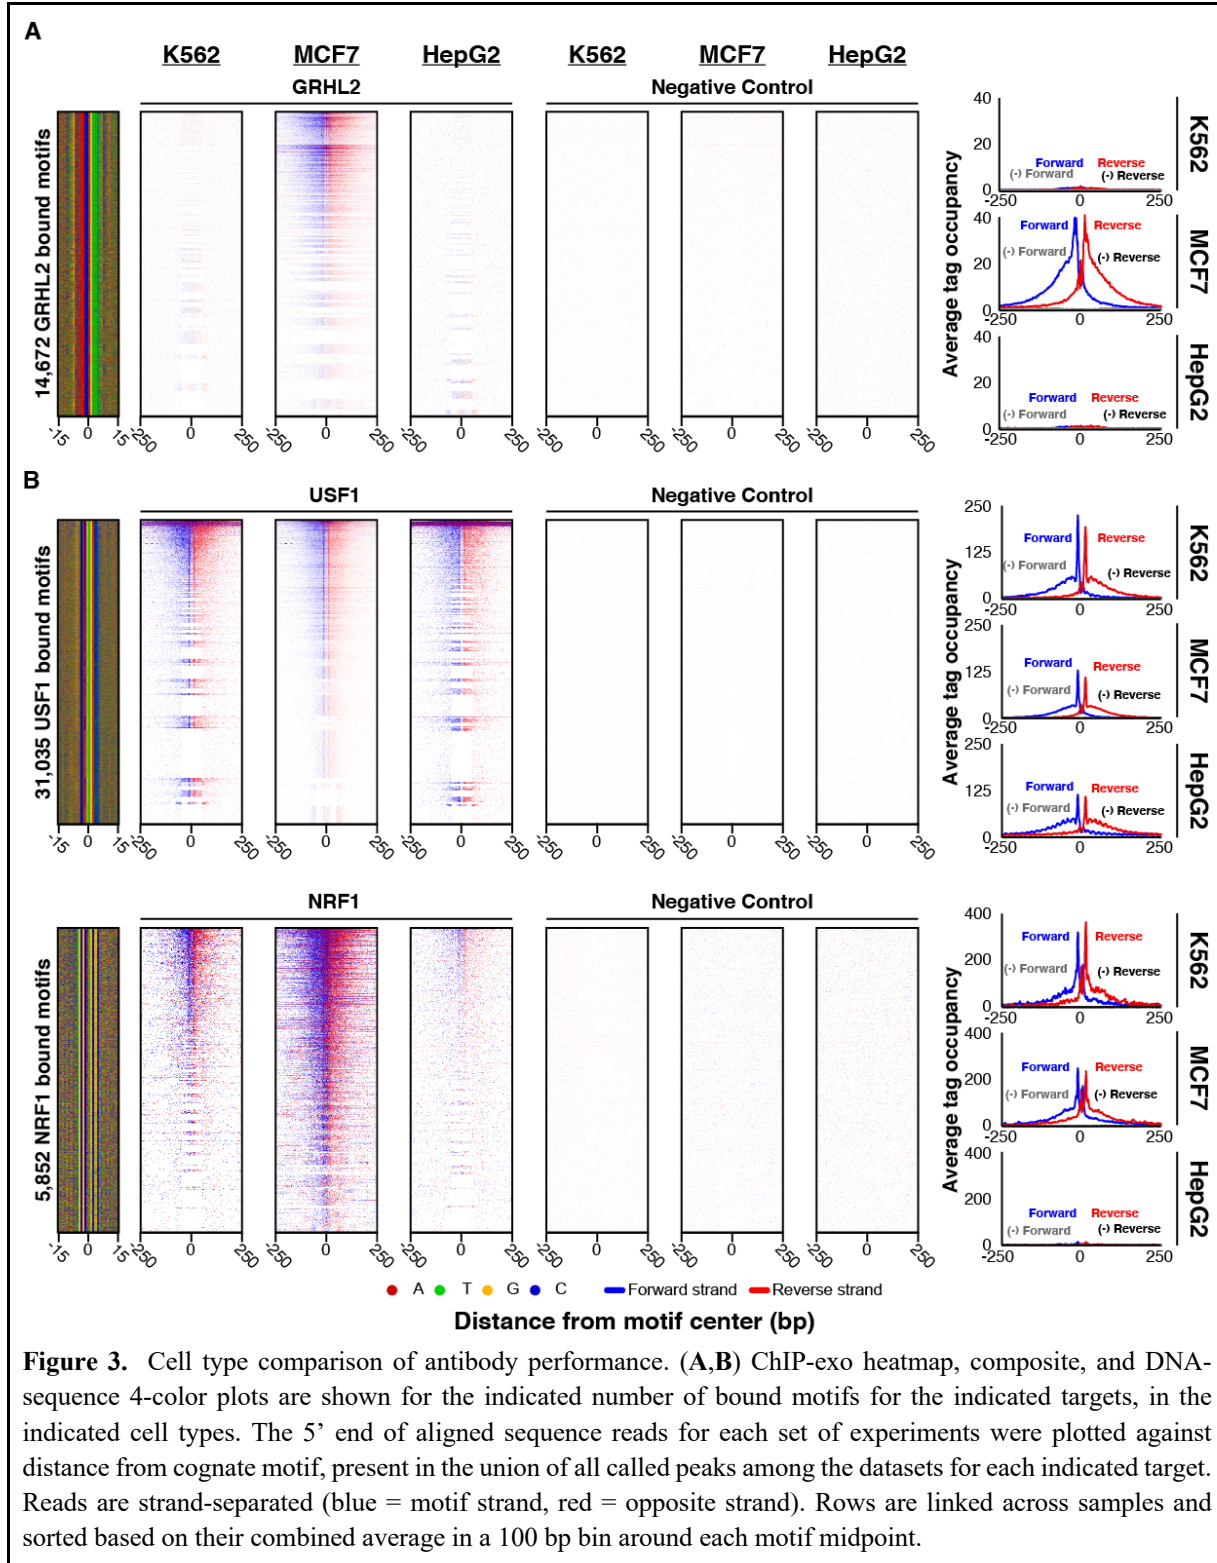

360 We next tested a subset of PCRPs mAbs on donated de-identified human organs. ChIP-  
361 exo was performed using mAbs against USF1, YY1, and GABPA in chromatin from human liver  
362 (2 different specimens), kidney, placenta, and breast tissue (**Figure 4**). Largely consistent with  
363 the cell line ChIP's, enrichment and aligned read patterning was observed with all three mAbs  
364 for the liver and kidney, that was diminished in placenta and not detectable in breast. It remains  
365 to be determined whether the lack of signal in breast is due to technical limitations in chromatin  
366 yields versus tissue specificity of chromatin interactions. Nonetheless, these findings  
367 demonstrate the utility of at least some PCRPs mAb in epigenomic profiling of human clinical  
368 specimens.  
369

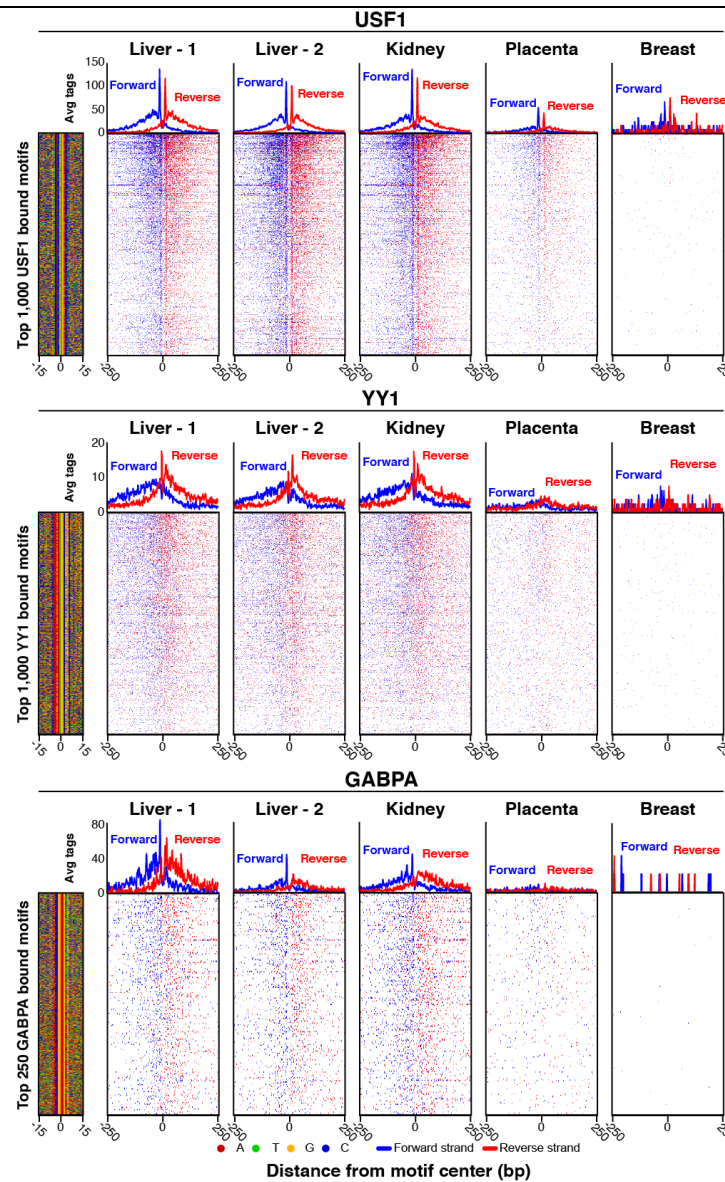

**Figure 4.** Application of ChIP-exo in human tissue using PCRPs mAbs. ChIP-exo heatmap, composite, and DNA-sequence 4-color plots are shown for the indicated number and type of bound motifs for the indicated targets, in the indicated organ types (liver includes two donors). The 5' end of aligned sequence reads for each set of experiments were plotted against distance from cognate motif, present in the union of all called peaks between the datasets for each indicated target. Reads are strand-separated (blue = motif strand, red = opposite strand). Rows are linked across samples and sorted based on their combined average in a 100 bp bin around each motif midpoint.

370

### 371 **Evaluation using CUT&RUN.**

372 CUT&RUN has been used to measure genome-wide protein-DNA interactions (Skene et  
373 al. 2018). It uses a fusion of protein A/G (pAG; which binds most antibody isotypes in common  
374 use) and micrococcal nuclease (MNase). A ssTF-specific antibody is added to immobilized  
375 permeabilized cells or nuclei (under native or crosslinked conditions), where it binds to its  
376 chromatin target. pAG-MNase is next added, recruited via pAG to the target-specific antibody,  
377 and the MNase portion cleaves local DNA. The result is a selective release of chromatin from the  
378 otherwise insoluble nucleus, where genomic enrichment can be identified by sequencing. We  
379 tested 40 PCRPs antibodies in K562 by native CUT&RUN in replicate (see Methods), of which  
380 25 had been selected based on ChIP-exo enrichment. For USF2, NRF1, USF1, and YY1, we  
381 mapped CUT&RUN cleavage sites around their ChIP-exo detected cognate motifs. Multiple  
382 nonspecific IgGs served as the negative controls. As additional negative controls, we mapped  
383 DNA cleavages around this same set of motifs using the other noncognate ssTF datasets, where  
384 only background cleavage is expected (as we did for ChIP-exo in **Figure 1** and ChIP-seq in  
385 *Supplementary Fig. 4*). Of all 40 PCRPs antibodies tested, USF2-1A11 produced the most  
386 robust CUT&RUN signal (**Figure 5A**), with a detection level matching ChIP-exo, and low IgG-  
387 only background. Thus, the native CUT&RUN assay as implemented here has the ability to  
388 detect site-specific protein-DNA interactions through at least one PCRPs mAb. However, for the  
389 NRF1, USF1, and YY1 mAbs, which had worked well in ChIP-exo, we observed little or no  
390 enrichment above background in native CUT&RUN (**Figure 5B**). This may reflect intrinsic  
391 target incompatibility with the native approach, or that antibody-specific optimization is  
392 warranted. Analysis results for the remaining CUT&RUN datasets and controls are in  
393 *Supplementary Table 4*. Of note, a DNA-accessibility footprint was observed in some negative  
394 control experiments, including a CTCF dataset at noncognate CTCF locations (e.g., at NRF1 and  
395 USF1 motifs in **Figure 5B**). This may indicate background cleavage by untargeted pAG-MNase  
396 at TF binding sites, perhaps due to the open chromatin at these locations or an intrinsic MNase  
397 sequence bias and demonstrates the importance of controls with the CUT&RUN approach.  
398 Background cleavage intensity may also vary based on the amount and type of IgG used in the  
399 negative control, making peak-calling less reliable. Thus, cognate target specificity in most of  
400 these CUT&RUN experiments was not established.

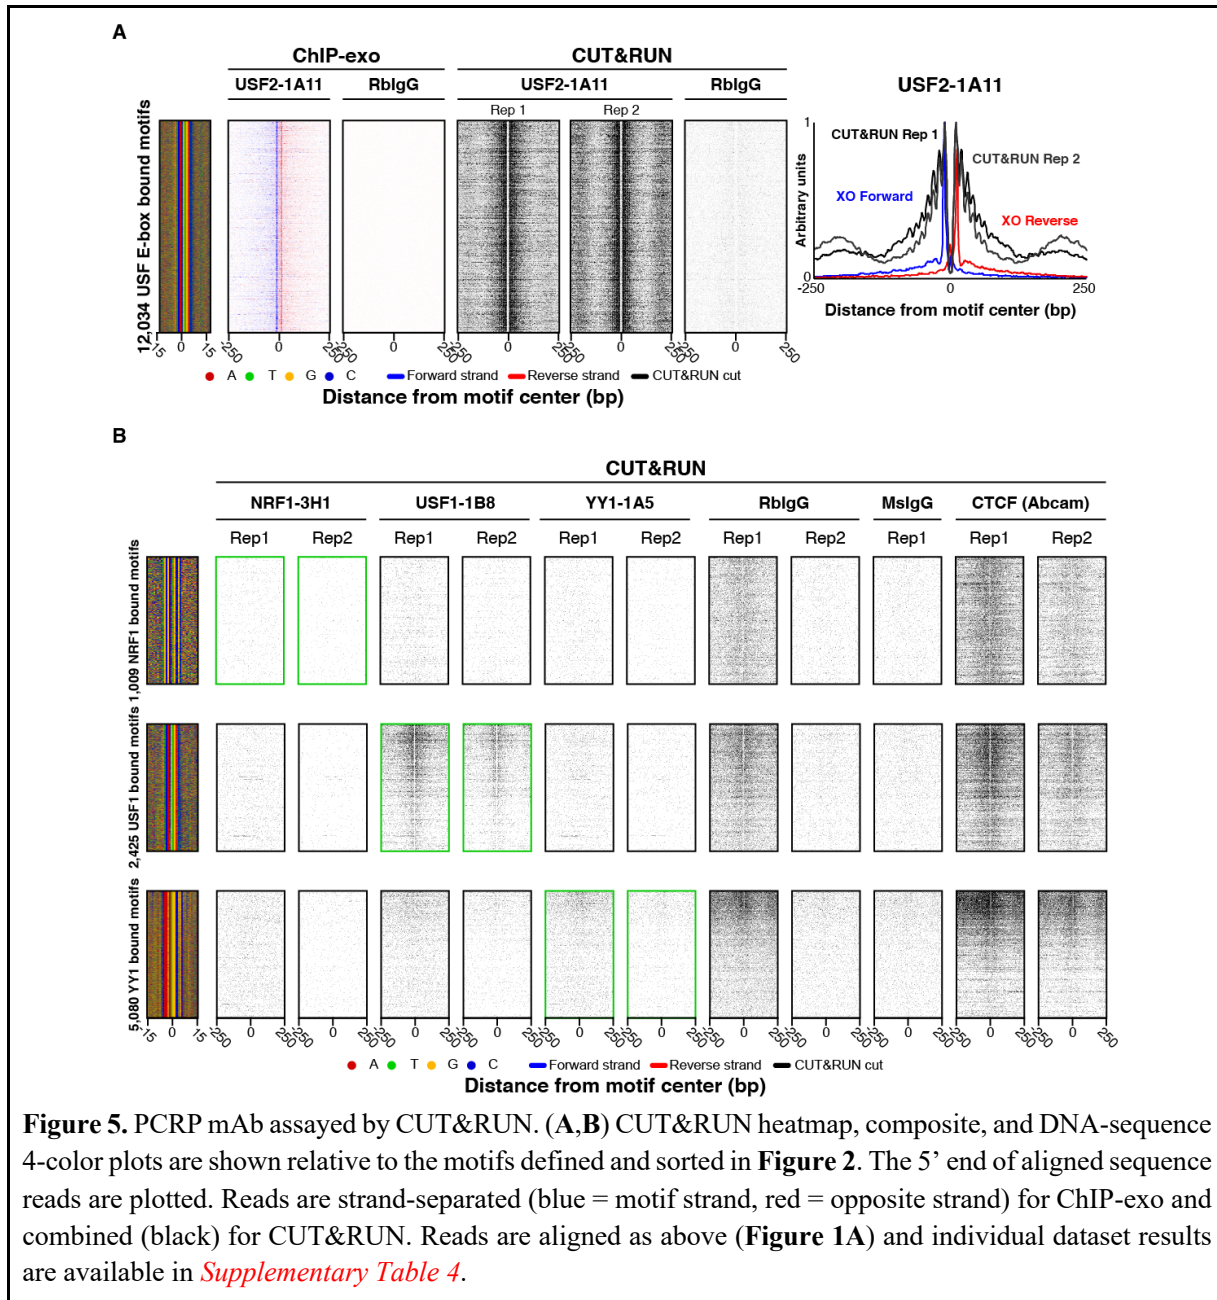

401

## 402 Evaluation by STORM

403 As part of our PCRp mAb evaluation, we performed Stochastic Optical Reconstruction  
 404 Microscopy (STORM), which can visualize cellular structures / processes at nanometer  
 405 resolution (Betzig et al. 2006). The approach involves the use of fluorescently conjugated  
 406 antibodies that might be expected to bind identifiable structures in specific subcellular  
 407 compartments. Of the 39 PCRp mAbs surveyed (*Supplementary Table 5*), most displayed peri-  
 408 cytoplasmic staining, rather than expected punctate nuclear staining (*Supplementary Fig. 6*).  
 409 Thus, without further supporting evidence, these results were inconclusive. However, we provide  
 410 these images as comparison datasets for future studies.

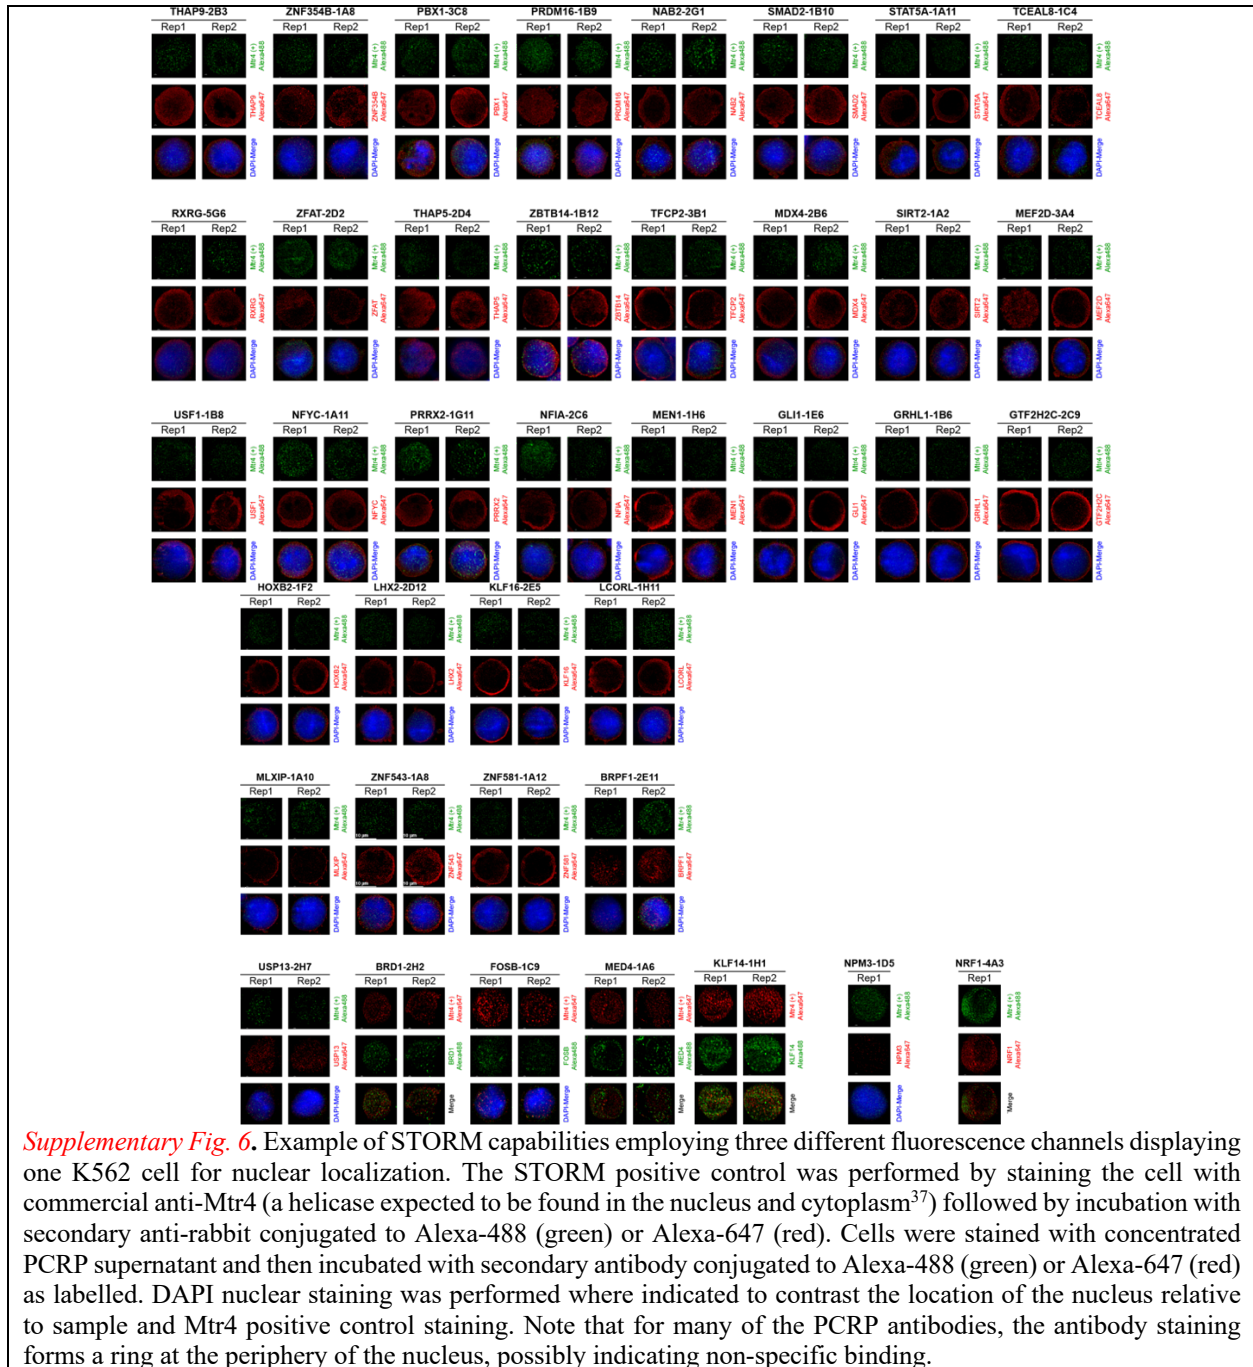

411

## 412 Evaluation using *in vitro* binding assays

413 We next tested 44 PCR mAbs by *in vitro* protein binding assays. A classic method to  
 414 evaluate antibody specificity is western blotting: size separation of complex protein mixtures  
 415 using denaturing gel electrophoresis (SDS-PAGE), followed by membrane transfer, and  
 416 immunoprobing with an antibody of interest to determine the protein species it detects. Since  
 417 endogenous targets can exist at a level below the sensitivity of detection, we used coupled-*in*  
 418 vitro transcription/translation (IVT) in crude HeLa cell extracts to produce 32 TFs as unpurified  
 419 amino-terminal GST-fusion proteins (*Supplementary Table 6*). This allowed for production of  
 420 higher levels of target proteins, but within a complex *milieu* of other proteins to allow specificity

421 to be addressed. Of the 44 PCRPs mAbs assayed by immunoblotting, 31 (70%) mAbs detected a  
 422 single predominant band of the expected molecular weight (twelve as biologically independent  
 423 replicates of the same antibody, plus nine replicated with a different mAb, plus ten performed as  
 424 a single replicate, *Supplementary Fig. 7*). As a positive control, anti-GST antibody detected 32 of  
 425 the 33 GST-fusion TFs. Thus, about two-thirds of the assayed PCRPs mAbs were specific in  
 426 recognizing their target proteins. This success rate (70%) may represent the upper limit of  
 427 success for these reagents.  
 428

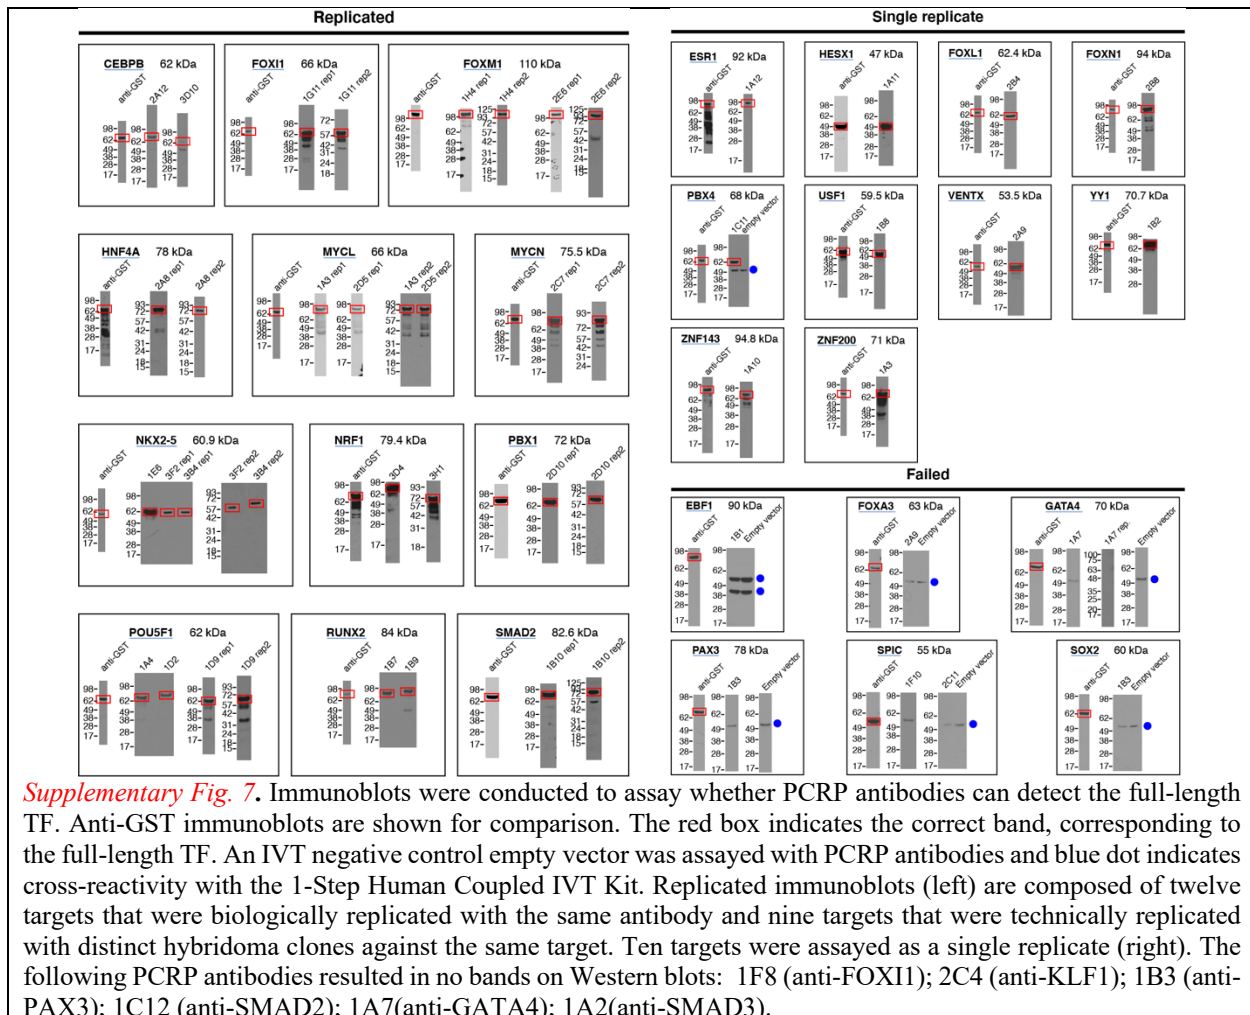

429  
 430 Protein binding microarrays (PBMs) is a technique to assay protein-DNA binding  
 431 specificity *in vitro* (Mukherjee et al. 2004; Berger et al. 2006; Siggers et al. 2011b). Proteins  
 432 used in PBMs are typically expressed as epitope tag-fusions, supporting detection on the DNA  
 433 array by fluorescent anti-tag antibody. A possible explanation for why some antibodies may fail  
 434 to work in ChIP experiments is that their target epitope may become inaccessible when the ssTF  
 435 is bound to a protein partner, DNA ligand, and/or subjected to modification by formaldehyde.  
 436 Therefore, for a set of 31 ssTFs that were of interest or performed well in ChIP, we used PBMs  
 437 to test 44 PCRPs mAb for their ability to recognize their DNA-bound target TF.

438 Briefly, the relevant IVT-generated TFs were incubated with DNA microarrays where all  
 439 possible 10-bp sequences were represented within ~44,000 60-bp probes on double-stranded  
 440 oligonucleotide arrays (Agilent) (Berger et al. 2006). For 20 of these 44 PCRPs mAbs (45%)  
 441 assayed against 16 of 22 tested targets, the PBM experiments successfully identified a DNA  
 442 binding motif consistent with the known or anticipated element (**Figure 6**). All mAb PBM  
 443 experiments were run with a parallel anti-GST antibody (positive control) to validate the  
 444 viability of the IVT-expressed target in PBM resulting in a 21/22 (95%) validation rate. Of the  
 445 20 PCRPs antibodies that successfully yielded the expected motif in PBMs, 11 (55%) had at least  
 446 some validation support by ChIP.  
 447

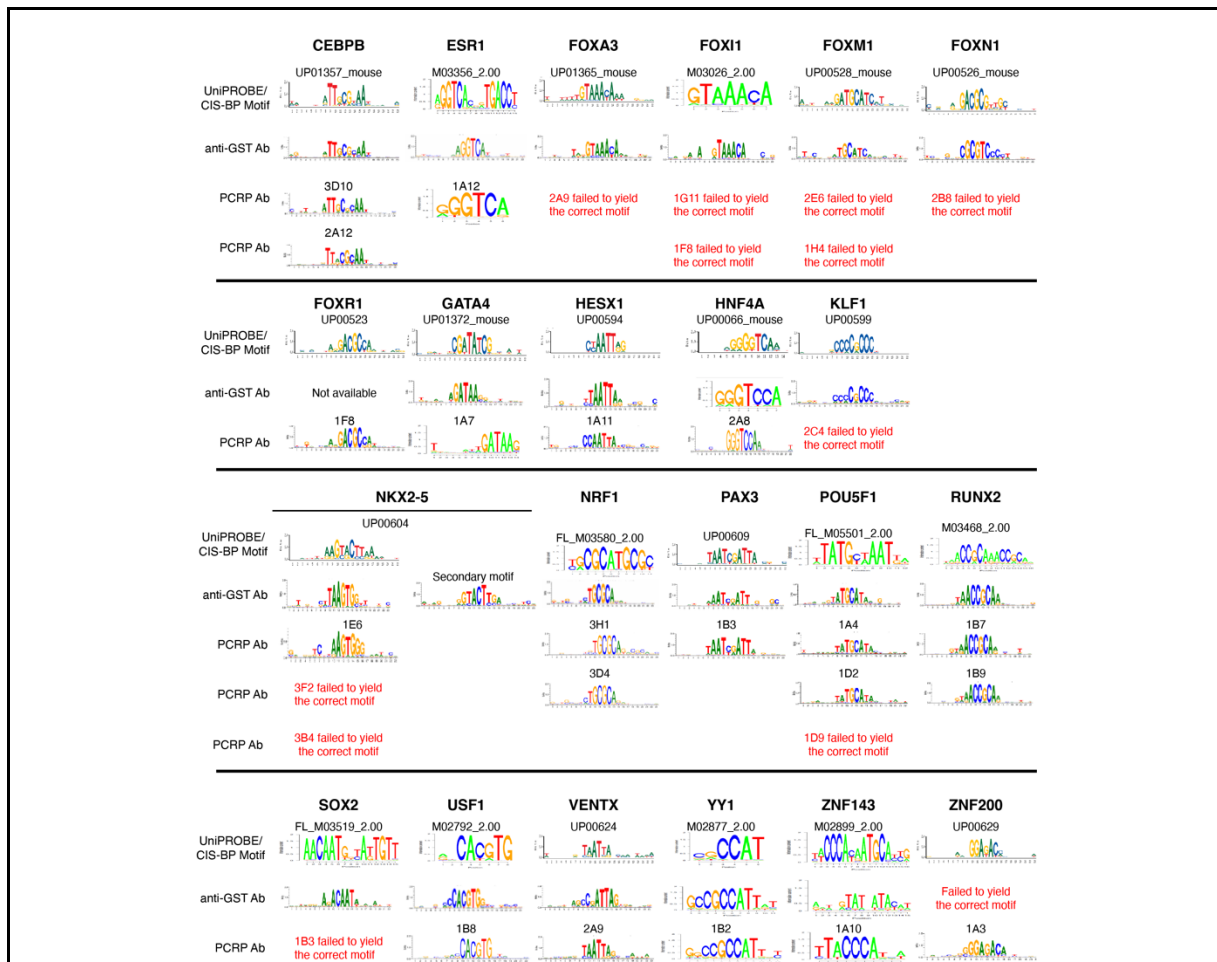

**Figure 6.** TF binding motifs derived from PBM experiments performed using anti-GST or PCRPs antibodies. Each full-length TF was assayed with its PCRPs mAb(s) and compared against its corresponding motif derived from an anti-GST PBM experiment and anticipated motif from the UniPROBE or CIS-BP databases (Weirauch et al. 2014; Hume et al. 2015). The TFs from UniPROBE or CIS-BP were assayed as extended DNA binding domains. For display of sequence motifs, probability matrices were trimmed from left and right until 2 consecutive positions with information content of 0.3 or greater were encountered, and logos were generated from the resulting trimmed matrices using enoLOGOS (Workman et al. 2005).



## 449 **Discussion**

450 The ability to interrogate the diverse human proteome is heavily reliant on specific  
451 affinity capture reagents, of which antibodies are the most widely used. PCR<sup>2</sup>P represented a pilot  
452 project for the entire human proteome, with initial focus on nuclear proteins. To this end, this  
453 study assayed nearly all PCR<sup>2</sup>P mAb against ~700 putative chromatin targets or TF using the  
454 genome-wide high resolution ChIP-exo assay. A smaller subset was analyzed by other genome-  
455 wide assays (ChIP-seq, CUT&RUN); super-resolution microscopy (STORM); to directly detect  
456 recombinant target proteins by immunoblotting; or their DNA-binding by PBMs. Our purpose is  
457 to present a technical “field” assessment of PCR<sup>2</sup>P mAb utility in biochemical and cellular assays.  
458 Given the published rigorous criteria for antibody validation (Landt et al. 2012; Wardle and Tan  
459 2015; Uhlen et al. 2016; Edfors et al. 2018; Sikorski et al. 2018), which may be assay specific,  
460 this work is not intended to provide a comprehensive resource of validated antibodies. Instead, it  
461 is a starting point for considering validation criteria and any limits that may be applicable to  
462 particular assays, especially when taking a systematic high-throughput approach. ChIP-exo  
463 identified up to 5% of the ~1,000 tested PCR<sup>2</sup>P antibodies as having high specificity for their  
464 targets, based on orthogonal evidence of motif enrichment and other criteria. These reagents  
465 would be the strongest candidates for more rigorous validation testing.

466 In contrast, a large number of PCR<sup>2</sup>P mAbs did not meet the defined validation criteria we  
467 employed. We suggest that some producing ambiguous outcomes might benefit from assay  
468 optimization: e.g., a different cell type or growth condition in which the target is expressed  
469 and/or activated for chromatin binding. Additionally, different metrics or validity thresholds may  
470 be needed. Notably, many of the PCR<sup>2</sup>P mAbs were evaluated by ChIP-exo in K562, while their  
471 target TFs may not be appreciably expressed in these cells. However, as shown for HSF1, even  
472 where a target is expressed, it may not substantially interact with chromatin (and thus escape  
473 detection) unless activated to do so. Therefore, knowledge of the underlying biology of the target  
474 may be critical in how ChIP specificity is assessed.

475 Several algorithmic explanations can be considered for lack of target detection. Some  
476 sequence-specific DNA binding proteins may not have been accommodated within our discovery  
477 framework. For example, a target protein may bind a nonstandard distribution DNA sequences  
478 that was not captured by current motif discovery algorithms. Alternatively, the target may  
479 interact with a wide range of genomic sites having different or degenerate DNA sequence motifs  
480 (including indirect sequence readout based on DNA shape (Rohs et al. 2009)) that are not  
481 accommodated by the discovery algorithms used in this study. Another possible scenario is that a  
482 target protein might not bind DNA directly, but only indirectly through other proteins, including  
483 those that potentially form an undiscovered chromatin class (which would not be in our  
484 discovery pipeline). We often found motifs that were long, simple, semi-repetitive, and highly  
485 degenerate (see online). These are not typical properties of sequence-specific DNA binding  
486 proteins and the ChIP-exo patterns at these motifs were often quite distinct from well-validated  
487 targets. Historically, some of these locations may have been set aside as problematic, and thus  
488 excluded from analysis (Consortium 2012). Whether these regions are artifactual or have some  
489 unknown biology remains to be determined. While we accepted these motifs as evidence of  
490 enrichment, we urge caution when interpreting such atypical binding events.

491 It was not practical in our high-throughput ChIP-exo screen to profile each PCRPs mAb in  
492 a wide range of cell types. However, for ssTFs with at least 500 significant peaks, we noticed an  
493 association between the expression of the target proteins and the detection of binding motif  
494 specificity (box plot in **Figure 2D**), and so expression may be a useful preliminary guide for cell-  
495 type selection. Furthermore, some targets may simply not be cross-linkable to chromatin in the  
496 assayed cell type (or any cell type), making ChIP an inappropriate assay. Unlike engineered  
497 epitope tags, each target-specific antibody may have a substantially different affinity for its  
498 cognate antigen. Therefore, we cannot rule out that at least some low- or non-performing  
499 antibodies could perform better under different immunoprecipitation conditions. Still other  
500 potential reasons for antibody non-performance may be due to trivial explanations like lot  
501 expiration or mis-labeling along the supply chain.

502 In total, 946 unique hybridoma clones were tested in at least one of the assays. We  
503 identified 50 clones (5%) that worked with high confidence in at least one assay. However, only  
504 a very small portion of the validation spectrum has been explored. Using relaxed criteria, that  
505 may reflect significant but off-target or unknown behavior, we find that 371 (39%) of the tested  
506 PCRPs mAb had at least some evidence of being different from background, in at least one assay.  
507 However, such marginal criteria require deeper characterization, such as target depletion/deletion  
508 or negative control cell lines for a more robust validation. The remaining 61% also warrant more  
509 testing in other cell types and conditions. Our analysis identifies an initial set of prioritized  
510 candidates. A detailed summary of each assay's results along with all of the measured quality  
511 control metrics is available in **Table 1**, along with an interactive searchable web-interface online  
512 at [www.PCRPvalidation.org](http://www.PCRPvalidation.org).

513

## 514 **Methods**

### 515 **ChIP protocols**

516 *Antibodies.* 1,308 TF hybridomas were reported through the PCRPs portal at the start of  
517 this study (September 2017). Hybridoma supernatants were purchased from Developmental  
518 Studies Hybridoma Bank (DSHB, U. Iowa, IA) as 1 ml aliquots. Monoclonal antibody (mAb)  
519 concentration averaged 36 ug/ml by ELISA quantification. Hybridoma supernatants contain  
520 ADCF-mAb cell culture medium (<https://dshb.biology.uiowa.edu/tech-info>.) and residual (2%)  
521 fetal bovine serum, which has a reported IgG concentration of 1-6 ug/ml (Son et al. 2001).  
522 DSHB preparation dates were provided. Concentrated mAbs and their concentration were  
523 generously provided by CDI laboratories (Mayaguez, PR).

524 *Cell material.* Cell stocks were obtained by the Pugh laboratory from ATCC. K562 were  
525 grown in suspension using IMDM media and periodically checked for mycoplasma  
526 contamination. HepG2 and MCF7 were grown as adherent cells in DMEM media. MCF7 cells  
527 were additionally grown in phenol red-free DMEM and treated with Beta-estradiol 30 min prior  
528 to cell harvest. Cells were pelleted, re-suspended in PBS, crosslinked with 1% formaldehyde for  
529 10 min, and then quenched with a molar excess of glycine. Donated human organs were obtained  
530 from NDRI (Philadelphia, PA) and then cryoground to fine powder using the SPEX cryomill  
531 cryogrinder. Frozen tissue powder was re-suspended in room-temperature PBS containing  
532 formaldehyde to a final concentration of 1% and quenched with a molar excess of glycine. All

533 cells and tissue for ChIP-exo then proceeded through standard lysis and sonication protocol  
534 described below after crosslink quenching. HCT116 cells (ATCC CCL-247) were grown in the  
535 Shilatifard laboratory in DMEM supplemented with 10% FBS (Fisher Scientific, 35-015-CV).  
536 70%–80% confluent HCT116 cells were heat shocked for 1 hr by adding pre-heated conditioned  
537 media pre-heated to 42°C (Lim et al. 2017). Heat shock and non-heat shock HCT116 cells were  
538 washed with PBS before fixing with 1% formaldehyde (Sigma, 252549) in PBS for 15 minutes  
539 and processing for ChIP-seq.

540 ChIP-exo testing was initially prioritized in K562, MCF7, and HepG2, using gene  
541 expression values (FPKM in RNA-seq) generated from the ENCODE project as the basis for the  
542 cell type used (Uhlen et al. 2005; Consortium 2012). Targets were assigned to the cell type most  
543 likely to express the protein of interest. If no cell line had a clear high expression for a specific  
544 target (>25% FPKM relative to all other considered cell lines), testing defaulted to K562. K562  
545 was selected as the default due to its status as a Tier 1 ENCODE cell line and the plethora of  
546 existing genomic data that could orthogonally support any findings. Samples were processed in  
547 batches of 48 in 96 well plate format. The PCR-derived USF1 or NRF1 antibody served as a  
548 positive control for every processed cohort as well as an IgG or “No Antibody” mock ChIP  
549 negative control. Crosslinked sonicated chromatin from ~7 million cells was incubated with  
550 antibody-bound beads, then subjected to the ChIP-exo 5.0 assay (Rossi et al. 2018).

551 *ChIP-exo 5.0 assay.* Chromatin for ChIP-exo was prepared by resuspending crosslinked  
552 and quenched chromatin in Farnham cell lysis buffer at a ratio of 25 million cells to 1 mL of  
553 buffer for 20 min at 4°C. At the 10 min mark, cells were pushed through a 25G needle 5 times to  
554 enhance cellular lysis. Nuclei were then isolated by pelleting at 2,500g for 5min. Nuclei were  
555 resuspended in RIPA buffer (25 million cells to 1 mL of buffer) for an additional 20 min at 4°C  
556 and then pelleted again at 2,500g for 5 min. Disrupted nuclei were then finally resuspended in  
557 1X PBS (25 million cells to 1 mL of buffer) and sonicated for 10 cycles (30on/30off) in a  
558 Diagenode Pico. Solubilized chromatin was then processed through ChIP-exo. Production-scale  
559 ChIP-exo 5.0 was generally performed in batches of 48 in a 96-well plate, alternating every  
560 column to reduce risk of cross-contamination. Briefly, solubilized chromatin was incubated with  
561 Protein A/G Dynabeads, preloaded with 3 ug of antibody, overnight then sequentially processed  
562 through A-tailing, 1<sup>st</sup> adapter ligation, Phi29 Fill-in, Lambda exonuclease digestion, cross-link  
563 reversal, 2<sup>nd</sup> adapter ligation, and PCR for final high-throughput sequencing. Equal proportions  
564 of ChIP samples were barcoded, pooled, and sequenced. Illumina paired-end read (40 bp Read 1  
565 and 36 bp Read 2) sequencing was performed on a NextSeq 500 and 550. While, on average, we  
566 sought ~10 million total paired-end reads per ChIP, we accepted less if there was strong evidence  
567 of target enrichment. Otherwise, we performed an additional round of sequencing. The 5' end of  
568 Read\_1 corresponded to the exonuclease stop site, located ~6 bp upstream of a protein-DNA  
569 crosslink. Read\_2 served two indirect functions: to provide added specificity to genome-wide  
570 mapping, and to remove PCR duplicates.

571 *ChIP-seq.*  $1 \times 10^8$  cells were fixed in 1% formaldehyde (Sigma, 252549) in PBS for 15-  
572 20 min at room temperature and quenched with 1/10th volume of 1.25 M glycine for 5 minutes at  
573 room temperature. Cells were collected at 1,000xg for 5 minutes, washed in PBS, pelleted at  
574 1,000xg for 5 min and pellets were flash frozen in liquid nitrogen and stored at -80°C until use.

575 Pellets were thawed on ice and resuspended in 10 ml lysis buffer 1 (50 mM HEPES, pH 7.5, 140  
576 mM NaCl, 1 mM EDTA, 10% glycerol, 0.5% IGEPAL CA-630, 0.25% Triton X-100 with  
577 5µl/ml Sigma 8340 protease inhibitor cocktail incubated on ice 10 minutes, pelleted 1,500xg and  
578 subsequently washed in lysis buffer 2 (10 mM Tris-HCl pH 8.0, 200 mM NaCl, 1 mM EDTA,  
579 0.5 mM EGTA and 5ul /ml protease inhibitor) as with lysis buffer 1 before resuspending in 1 ml  
580 lysis buffer 3 (10 mM tris-HCl pH 8.0, 1 mM EDTA, 0.1% SDS and 5 ul/ml protease inhibitors)  
581 for sonication as previously described (Lee et al. 2006). Chromatin was sheared in a 1 ml  
582 milliTUBE with AFA fiber on a Covaris E220 using 10% duty factor for 2 min. The  
583 sheared chromatin concentration was estimated with Nanodrop at OD 260 and diluted to 1 mg/ml  
584 in ChIP Dilution Buffer (10% Triton X-100, 1M NaCl and 1% Sodium deoxycholate). 1 mg  
585 chromatin was combined with 4 µg hybridoma tissue culture supernatant and rotated overnight at  
586 4°C. 40 µl of protein G Dynabeads was added and incubated for 2-4 hr rotating at 4°C. Samples  
587 were washed 5 times with 1 ml RIPA buffer, 2 times with TE with 50 mM NaCl. Chromatin was  
588 eluted with 800 µl elution buffer (50 mM Tris pH 8.0, 1 mM EDTA, 0.1% SDS) for 30 min at  
589 65°C shaking at 1,500 rpm in a ThermoMixer (Eppendorf). Supernatants were collected,  
590 digested with 20 µl of 20 mg/ml Proteinase K and incubated overnight at 65°C. DNA was  
591 purified with phenol chloroform extraction. 500 µl of the aqueous phase was precipitated with 20  
592 µl 5M NaCl, 1.5 µg glycogen and 1 ml EtOH on ice for 1 hr or at -20°C overnight.

593 Sequencing libraries were prepared with the KAPA HTP library prep kit (Roche) using 1-  
594 10 ng DNA and libraries were size selected with AMPure XP beads (Beckman Coulter). Illumina  
595 50 bp single-end read sequencing was performed on a NextSeq 500 or NovaSeq 6000. The  
596 modular pipeline Ceto (<https://github.com/ebartom/NGSbartom>) was used to convert base calls  
597 to fastq, align reads to bam files and make bigWig coverage tracks. Briefly, bcl2fastq with  
598 parameters -r 10 -d 10 -p 10 -w 10 was used to generate fastq files. Trimmomatic version 0.33  
599 with the options single end mode (SE) and -phred33 was used to remove low-quality reads.  
600 Reads were then aligned to hg19 with Bowtie 1.1.2 (Langmead et al. 2009) with options -p 10 -m  
601 1 -v 2 -S, thus keeping only uniquely mapped reads, and allowing up to two mismatches.  
602 Coverage tracks were created with the Rscript from Ceto, createChIPtracks.R --extLen=150 to  
603 extend reads to 150 bp, and coverage was normalized to total mapped reads (reads per million).  
604 Peaks were called with MACS2 2.1.0 (Zhang et al. 2008) with a cutoff of -q 0.01 and the input  
605 chromatin used as the control dataset. Heatmaps and composite plots were made with deepTools  
606 (Ramirez et al. 2016) version 2.0. computeMatrix using reference-point peaks. “Black-listed”  
607 regions were removed with parameter -bl Anshul\_Hg19UltraHighSignalArtifactRegions.bed  
608 (<ftp://encodeftp.cse.ucsc.edu/users/akundaje/rawdata/blacklists/hg19>). For metagene plots, we  
609 used the Ensembl version 75 transcripts with the highest total coverage from the annotated TSS  
610 to 200 nt downstream and were at least 2 kb long, and 1 kb away from the nearest gene.

611 *RNAi*. Lentiviruses were packaged in HEK293T cells transfected with 1 µg pME-VSVG,  
612 2 µg PAX2 and 4 µg shRNA in pLKO.1 backbone using Lipofectamine 3000 (Thermo Fisher  
613 Scientific, Waltham, MA) according to the manufacturer’s instructions. The virus particles were  
614 then harvested 24 to 48 hours later by passing through a 0.45 µm syringe filter (Thermo  
615 Scientific). Viruses were mixed with an equal volume of fresh media supplemented with 10%  
616 FBS and polybrene was added at a final concentration of 5 µg/mL to increase infection

617 efficiency. The medium was changed 6 hours after infection. Cells were selected with 2  $\mu$ g/ml  
618 puromycin for three days before Western blotting (anti-NRF1 rabbit mAb clone D9K6R from  
619 CST and anti-beta tubulin mouse mAb clone E7 from DSHB) and ChIP-seq experiments. The  
620 following shRNA sequences were used:

621

|           |                                                            |
|-----------|------------------------------------------------------------|
| shNRF1-F2 | CCGGCCTCATGTATTTGAGTCTAATCTCGAGATTAGACTCAAATACATGAGGTTTTTG |
| shNRF1-R2 | AATTCAAAAACCTCATGTATTTGAGTCTAATCTCGAGATTAGACTCAAATACATGAGG |
| shNRF1-F3 | CCGGCCGTTGCCCAAGTGAATTATTCTCGAGAATAATCACTGGGCAACGGTTTTTG   |
| shNRF1-R3 | AATTCAAAAACCGTTGCCCAAGTGAATTATTCTCGAGAATAATCACTGGGCAACGG   |

622

### 623 **Bioinformatic protocols**

624 *Technical performance.* A series of modular bioinformatic analyses were implemented to  
625 evaluate technical success of ChIP-exo library construction and sequencing, independent of  
626 whether the antibody found its target or not. 1) Sequencing depth (standard is 8-10M), which is  
627 the total number of sequencing reads having a target-specific barcode. 2) Adapter dimers  
628 (standard is <2%), which is the fraction of reads that contain the sequencing adapters but lack a  
629 genomic insert. 3) Alignment (standard is 70-90%), which is the percent of reads that map to the  
630 reference human genome after removing adapter dimers. 4) PCR duplicates (standard is <40%),  
631 which are expected to have identically mapped Read\_1 and Read\_2 5' ends. We assume that  
632 when Read\_1 and Read\_2 5' ends have identical mapped coordinates; they represent PCR  
633 duplicates. Since Read\_2 is generated by sonication it is expected to be distributed across a  
634 region, and thus not likely to be at the same coordinate twice. Since PCR duplicates are not a  
635 direct product of ChIP, they add no value to enrichment metrics. High PCR duplicates, at normal  
636 sequencing depths, often means technical loss of material during library construction prior to  
637 PCR.

638 *Peak calling.* We utilized two distinct algorithms for ChIP-exo peak-calling. The first  
639 algorithm was GeneTrack which used a gaussian kernel to call strand-separated peaks at the 5'  
640 ends of reads (Albert et al. 2008). The reads were then paired across strands and the tag  
641 occupancy was normalized using the NCIS approach (Liang and Keles 2012). Peak significance  
642 was called using either the binomial or Poisson test (taking whichever p-value was higher) with  
643 Benjamini-Hochberg correction and a q-value cutoff of  $q < 0.01$ . GeneTrack was used to generate  
644 the ChIP-exo peaks used in the manuscript figures. The other peak-caller used was the ChExMix  
645 algorithm, which is a high-resolution peak-caller designed to simultaneously identify enriched  
646 sequence motifs and distinct sub-types of binding using a combination of clustering and  
647 hierarchical mixture modeling (Yamada et al. 2019). ChExMix was designed to take advantage  
648 of ChIP-exo's ability to identify protein co-factors through indirect crosslinking events by  
649 modeling detected tag distributions in ChIP-exo data and using tree-clustering based approaches  
650 to determine the significant peak subtypes that exist with ChIP-exo data. ChExMix-called peaks  
651 were used to interrogate the ChIP-exo peaks subtype structure and are visualized on the  
652 [www.PCRPvalidation.org](http://www.PCRPvalidation.org) website.

653 *Motif enrichment via ChExMix.* De novo motif discovery was performed by ChExMix.  
654 Each motif was compared against the JASPAR database using TOMTOM with default  
655 parameters to identify similarity to known motifs (Bailey et al. 2009; Fornes et al. 2020).  
656 Heatmaps and composite plots were generated of sequence reads aligned relative to motif  
657 midpoints of all peaks containing an enriched motif. For samples with high background, low  
658 complexity, and/or low sequencing depth, it is possible the antibody is valid, but that standard de  
659 novo motif discovery may fail. We developed an orthogonal method for motif detection. By first  
660 identifying all non-redundant motif classes (Castro-Mondragon et al. 2017) in the genome, we  
661 then overlap low-threshold ChExMix peaks and determined which motif class possesses  
662 overlapping peaks above background ( $>2 \log_2$ ).

663 *Motif enrichment and centering analysis.* For ChIP-exo data generated from K562,  
664 HepG2 and MCF-7 cells, narrowpeak data were called using ChExMix (Yamada et al. 2019); we  
665 restricted our motif enrichment analysis to narrowpeak datasets that contained more than 500  
666 peaks. For ChIP-seq data generated from HCT116 cells, we required the presence of 100 peaks  
667 due to the typical lower number of called peaks in those datasets as compared to ChIP-exo. Motif  
668 enrichment analysis of ChIP-exo and ChIP-seq peaks was then performed as described  
669 previously (Mariani et al. 2017). For ChIP-exo peaks, we first filtered for the datasets that had  
670 more than 500 peaks, and then used for the comparison the top 500 peaks, with peaks defined as  
671 the ChIP-exo summits computationally padded with the region spanning [-100 bp, +100 bp]. To  
672 perform an analogous analysis on ChIP-seq peaks, we fixed both the number of peaks per dataset  
673 (e.g., top 100 peaks) and the peak size, which we computationally trimmed similarly to the ChIP-  
674 exo data to span [-100 bp, +100 bp] surrounding the ChIP-seq peak summit. For each ChIP peak  
675 set, we generated background sequences using GENRE software with the default human setting,  
676 to ensure the same level of promoter overlap, repeat overlap, GC content and CpG dinucleotide  
677 frequency between each peak and its associated background sequence (Mariani et al. 2017). We  
678 manually curated a collection of 100 position weight matrices (PWMs), primarily from  
679 biochemical TF DNA binding assays (*i.e.*, PBM or HT-SELEX), from the UniPROBE and  
680 CisBP databases, as a representative repertoire of human sequence-specific TF binding motifs  
681 (Weirauch et al. 2014; Hume et al. 2015; Mariani 2020). We scored each sequence for matches  
682 to each of the motifs using the function "matchPWM" from the "Biostrings" R package. Motif  
683 enrichment was quantified using an established AUROC metric that assesses the presence of a  
684 motif among the 500 highest confidence peaks (foreground set) as compared to the  
685 corresponding background set of sequences using publicly available tools for analysis of TF  
686 ChIP-seq data (Mariani et al. 2017). We also assessed each motif for its enrichment towards the  
687 centers of each ChIP-exo or ChIP-Seq peak set as described previously (Mariani et al. 2017).  
688 Briefly, we first identified the PWM score threshold that maximized the difference between  
689 foreground and corresponding background sets in the number of sequences containing at least  
690 one PWM match (*Optimal PWM Match Score*). If a sequence had multiple PWM matches, we  
691 considered only the highest score site. We then calculated the distance from each of these sites to  
692 the corresponding peak summits and used the mean of these distances in the foreground or  
693 background set to quantify the motif enrichment towards the centers of ChIP peaks. The *P*-  
694 values associated with motif enrichment (*i.e.*, AUROC value) and enrichment towards the peak

695 summits (*i.e.*, mean motif distance to peak summit) were both calculated by using a Wilcoxon  
696 signed-rank test comparing their scores (PWM match score and PWM match distance to distance  
697 to peak summit, respectively) for foreground and background sequences when the PWM  
698 threshold was set to the optimal PWM match score. We then adjusted the *P*-values across the  
699 PWM collection with a false discovery rate test for multiple hypothesis testing. To test the  
700 significance of the difference in the TPM distributions between ChIP datasets with enriched  
701 versus non-enriched motifs, we calculated the *P*-value by a Wilcoxon test using the function  
702 `wilcox.test` in R.

703 *Genome annotation enrichment.* Only a small fraction of DNA-interacting factors binds  
704 sequence-specific motifs. In the case of targets with either no expected motif or no known  
705 function, determining peak enrichments at annotated regions of the genome can provide evidence  
706 of ChIP success. The relative frequency of peaks occurring in different functional genomic  
707 regions as defined by chromHMM was calculated for each target, an IgG negative control, and  
708 for random expectation (Ernst et al. 2011). The  $\log_2$  frequency enrichment of sample over IgG  
709 control was used to identify regions of enrichment, as well as significant areas of de-enrichment  
710 (regions that selectively avoid the target). Significant peaks were intersected with chromHMM  
711 and Segway states to generate frequency histograms for overlap with predicted chromatin states  
712 (Ernst et al. 2011; Hoffman et al. 2012). Peaks derived from the matched negative control dataset  
713 were also intersected with annotated states. The  $\log_2$  ratio of sample state frequency over control  
714 state frequency was then calculated in order to identify general state enrichment of the sample  
715 throughout the genome.

716 *Positional enrichment at promoters and insulators.* In order to identify enrichment in  
717 well-characterized promoter regions, sequence reads for the target, a matched “No Antibody”  
718 control, and an IgG were aligned relative to annotated transcription start sites (TSS). Heatmaps  
719 of all genes and composite plots of the top 1,000 TSS by gene expression (RNA-seq FPKM)  
720 were generated from the data<sup>7</sup>.

721 *Heatmaps, composite plots, and 4color sequence plots.* All heatmaps, composite plots,  
722 and 4 color sequence plots were generated using ScriptManager v0.12  
723 (<https://github.com/CEGRcode/scriptmanager>). ScriptManager is a Java-based GUI tool that  
724 contains a series of interactive wizards that guide the user through transforming aligned BAM  
725 files into publication-ready figures.

726

## 727 **CUT&RUN protocols**

728 *Antibody sourcing and concentration.* Antibody hybridoma supernatants, name, clone ID,  
729 and lot) were from DSHB. mAbs were concentrated using Amicon Ultra-4 Centrifugal Filter  
730 Units with a 50 kDa cut-off (Millipore Sigma Cat # UFC805024) following manufacturer’s  
731 recommendations. All centrifugation steps (including 3x 4ml washes with 1X Tris buffered  
732 Saline [TBS]) were performed at 4,000 x g for 15 minutes at room temperature. Final  
733 concentrations for recovered mAbs (stored at 4°C in [TBS, 0.1% BSA, 0.09% Sodium Azide])  
734 were assumed based on initial concentrations / final recovery volumes and 1  $\mu$ g used per  
735 CUT&RUN experiment.

736 *CUT&RUN*. CUT&RUN was performed on 500k native nuclei extracted from K562 cells  
737 using CUTANA<sup>®</sup> protocol v1.5.1 [<http://www.epicypher.com>] which is an optimized version of  
738 that previously described (Skene et al. 2018). For each sample, nuclei were extracted by  
739 incubating cells on ice for 10 min in Nuclei Extraction buffer (NE: 20 mM HEPES–KOH, pH  
740 7.9; 10 mM KCl; 0.1% Triton X-100; 20% Glycerol; 0.5mM spermidine; 1x complete protease  
741 inhibitor [*Roche* # 11836170001]), collecting by centrifugation (600 g, 3 min, 4°C), discarding  
742 the supernatant, and resuspending at [100 µl / 500K nuclei] sample in NE buffer. For each target  
743 500K nuclei were immobilized onto Concanavalin-A beads (*EpiCypher* #21-1401) and incubated  
744 overnight (4°C with gentle rocking) with 1 µg of antibody (For all 40 PCR antibodies as above;  
745 RbIgG (*EpiCypher* 13-0042, lot 20036001-52); MsIgG (Invitrogen 10400C, lot VD293456);  
746 CTCF (*Millipore* 07-729, lot 3205452).

747 *Modified CUT&RUN library prep*. Illumina sequencing libraries were prepared from 1ng  
748 to 10ng of purified CUT&RUN DNA using NEBNext Ultra II DNA Library Prep Kit (*New*  
749 *England Biolabs* # E7645) as previously (Liu et al. 2018) with the following modifications to  
750 preserve and enrich smaller DNA fragments (20-70 bp). Briefly, during end repair the cycling  
751 time was decreased to 30 mins at 50°C. After adapter ligation, to purify fragments >50bp, 1.75x  
752 volumes of Agencourt AMPure XP beads (*Beckman Coulter* #A63881) were added for the first  
753 bead clean-up before amplification following manufacturer's recommendations. PCR  
754 amplification cycling parameters were as described (Skene et al. 2018). Post-PCR, two rounds of  
755 DNA size selection were performed. For the first selection, 0.8x volume of AMPure XP beads  
756 was added to the PCR reaction to remove products >350bp. The supernatant, containing  
757 fragments <350bp, was moved forward to a second round of size selection using 1.2x volumes of  
758 AMPure XP beads, to remove products <150 bp. Libraries were quantified using Qubit  
759 Fluorometer (*Invitrogen*) and checked for size distribution with a Bioanalyzer (*Agilent*).

760 *CUT&RUN library sequencing and data analysis*. Libraries were sequenced on the  
761 *Illumina* NextSeq 550, obtaining ~5 million paired-end reads (75 x 75 nucleotides) on average.  
762 Paired-end FASTQ files were aligned to the hg19 reference genome using the ChIP-exo pipeline.  
763

## 764 **TF cloning, protein expression, western blots, and PBM protocols**

765 Full-length TFs were either obtained from the hORFeome clone collection or synthesized  
766 as gBlocks (Integrated DNA Technologies) (**Supplementary Table 7**), full-length sequence-  
767 verified, and transferred by Gateway recombinational cloning into either the pDEST15  
768 (ThermoFisher Scientific) or pT7CFE1-NHIS-GST (ThermoFisher) vectors for expression as N-  
769 terminal GST fusion proteins (Collaboration 2016). TFs were expressed by a coupled *in vitro*  
770 transcription and translation kit according to the manufacturer's protocols (**Supplementary**  
771 **Table 6**). Protein concentrations were approximated by an anti-GST western blot as described  
772 previously (Berger et al. 2006). All PCR antibodies were used at a final concentration of 40  
773 ng/mL in western blots; based on successful outcomes in PBM experiments, PCR antibodies  
774 1A7 (anti-GATA4), 2A4 (anti-HNF4A), and 1B3 (anti-PAX3) were also used at a final  
775 concentration of 1,000 ng/mL in western blots. 8x60K GSE 'all 10-mer universal'  
776 oligonucleotide arrays (AMADID #030236; Agilent Technologies, Inc.) were double-stranded  
777 and used in PBM experiments essentially as described previously, with minor modifications as  
778 described below (Berger et al. 2006; Berger and Bulyk 2009; Nakagawa et al. 2013). GST-



779 tagged TFs assayed in PBMs were detected either with Alexa488-conjugated anti-GST antibody  
780 (Invitrogen A-11131), or with a TF-specific PCRPs antibody, followed by washes and detection  
781 with Alexa488-conjugated goat anti-mouse IgG(H+L) Cross-Adsorbed Secondary Antibody  
782 (Invitrogen A-11001), essentially as described previously (Siggers et al. 2011b) (**Supplementary**  
783 **Table 6**). All PCRPs Abs were used undiluted in PBM experiments; a subset of the PCRPs Abs  
784 were also tested at a 1:5 or 1:20 dilution (**Supplementary Table 6**). All PBM experiments using  
785 PCRPs antibodies were performed using fresh arrays or arrays that had been stripped once, as  
786 described previously (Berger et al. 2006; Berger and Bulyk 2009). PBMs were scanned in a  
787 GenePix 4400A Microarray Scanner and raw data files were quantified and processed using the  
788 Universal PBM Analysis Suite (Berger et al. 2006; Berger and Bulyk 2009).

789

### 790 **STORM protocols**

791 *Supernatant concentration.* 3 milliliters of PCRPs supernatant were concentrated using the  
792 Amicon® Pro Affinity Concentration Kit Protein G with 10kDa Amicon® Ultra-0.5 Device  
793 following the manufacturer's recommendations. Supernatant was quantitated by  
794 spectrophotometer for rough approximation of concentration.

795 *Cellular preparation and staining.* K562 cells obtained from the ATCC (cat number  
796 CCL243) were grown in a humidified 5% CO<sub>2</sub> incubator. 3-5x10<sup>5</sup> cells were centrifuged at  
797 1,500 rpm for 5 minutes, washed with PBS, and plated on MatTek-brand glass bottom dishes  
798 (P35-G.1) prepared appropriately (washes with increasing concentrations of ethanol, followed by  
799 coating with poly-L-Lysine (Sigma P4707) for 5 minutes and subsequent washes with water and  
800 air-drying for 2h.) After plating, the cells were allowed to adhere for 2h and then washed with  
801 PBS. For fixation, 1ml of 4% paraformaldehyde and 0.1% glutaraldehyde in PBS were added  
802 for 10 minutes at room temperature with gentle rocking followed by blocking and  
803 permeabilization in 2% normal goat serum/1% Triton X-100 in PBS for 1h at room temperature  
804 with gentle shaking. Immunostaining was performed with anti-MTR4 antibody (Abcam 70551)  
805 at a dilution of 1:250 in 0.1% normal goat serum, 0.05% Triton X-100 overnight at 4 degrees C.  
806 The next morning cells were incubated with the secondary antibody (conjugated to Alexa-Fluor  
807 647 (Life Technologies)) at a 1:1000 dilution in 0.1% normal goat serum in PBS and incubated  
808 for 2h at room temperature followed by washes in PBS. This material was then subjected to  
809 immunostaining with PCRPs antibodies, by repeating the above procedure. PCRPs mAb  
810 hybridoma supernatant (3 ml) was first concentrated 30-100 fold since raw supernatants were  
811 unsuccessful in both confocal microscopy and STORM (data not shown). The secondary  
812 antibody was conjugated to Alexa-Fluor 488 (Life Technologies). At the end of the application  
813 of the second secondary antibody, the cells were washed 3x with PBS and DAPI (Sigma D8542)  
814 at a concentration of 1:500 in 0.1% normal goat serum in 1x PBS was applied for 10 minutes at  
815 room temperature. The cells were washed 3x with PBS and finally 4% paraformaldehyde/0.1%  
816 glutaraldehyde in PBS was applied for 10 minutes at RT before 3 washes in 1x PBS were  
817 performed and dishes stored at 4 degrees until microscopy could be performed.

818 *Microscopy.* Cells were brought to the imaging facility and OXEA buffer was applied (50  
819 mM Cysteimine, 3% v/v Oxyfluor, 20% v/v sodium DL Lactate, with pH adjusted to  
820 approximately 8.5, as necessary.) The two colors (Alexa fluor 488 and Alexa fluor 647) were  
821 imaged sequentially. Imaging buffer helped to keep dye molecules in a transient dark state.

822 Subsequently, individual dye molecules were excited stochastically with high laser power at their  
823 excitation wavelength (488 nm for Alexa fluor 488 or 647 nm for Alexa fluor 647, respectively)  
824 to induce blinking on millisecond timescales. STORM images and the correlated high-power  
825 confocal stacks were acquired via a CFI Apo TIRF 100 × objective (1.49 NA) on a Nikon Ti-E  
826 inverted microscope equipped with a Nikon N-STORM system, an Agilent laser launch system,  
827 an Andor iXon Ultra 897 EMCCD (with a cylindrical lens for astigmatic 3D-STORM imaging)  
828 camera, and an NSTORM Quad cube (Chroma). This setup was controlled by Nikon NIS-  
829 Element AR software with N-STORM module. To obtain images, the field of view was selected  
830 based on the live EMCCD image under 488-nm illumination. 3D STORM datasets of 50,000  
831 frames were collected. Lateral drift between frames was corrected by tracking 488, 561, and 647  
832 fluorescent beads (TetraSpeck, Life Technologies). STORM images were processed to acquire  
833 coordinates of localization points using the N-STORM module in NIS-Elements AR software.  
834 Identical settings were used for every image. Each localization is depicted in the STORM image  
835 as a Gaussian peak, the width of which is determined by the number of photons detected (Betzig  
836 et al. 2006). All of the 3D STORM imaging was performed on a minimum of two different K562  
837 cells.

838

#### 839 **Code Availability**

840 Our automated bioinformatic ChIP-exo analysis pipeline can be found at  
841 (<https://github.com/CEGRcode/PCRPpipeline>).

842

#### 843 **Data Availability**

844 Raw ChIP-exo sequencing files are available at NCBI GEO archive (GSE151287). Raw ChIP-  
845 seq sequencing files are available at NCBI GEO archive (GSE152144). PBM data will be  
846 available via the UniPROBE database (accession ID: LAI20A) upon publication. CUT&RUN  
847 data has been deposited at GEO: Accession GSE151326 [(5.27.20) NCBI tracking system  
848 #20907832]. Peak files for all figures are available at ([https://github.com/CEGRcode/2021-  
849 Lai\\_PCRP](https://github.com/CEGRcode/2021-Lai_PCRP))

850

#### 851 **Acknowledgements**

852 The Basu lab would like to thank Drs. Teresa Swayne and Emilia Laura Munteanu of the Herbert  
853 Irving Comprehensive Cancer Center Core Microscopy facility at Columbia University. The  
854 Pugh lab would like to thank Kyle Nilson for donating the peroxide stressed cells. The  
855 Shilatifard lab would like to thank Anna Whelan and Jordan Harris for technical assistance and  
856 Zibo Zhao and Marc Morgan for helpful discussions. The Bulyk lab thanks Steve S. Gisselbrecht  
857 for assistance with preparation of figures. ChIP-exo data was made available through the Cornell  
858 Institute of Biotechnology's Epigenomic Core Facility using the Platform for Epigenome and  
859 Genomic Research (PEGR), with NIH 5R01-ES013768-12 funding for the development and  
860 dissemination of PEGR. The authors gratefully acknowledge the support of the Institute for  
861 Computational and Data Sciences at the Pennsylvania State University through an ICDS Seed  
862 Grant. This work was supported by an administrative supplement to NIAID grant  
863 1R01AI099195 to U.B., an administrative supplement to NIH grant R21 HG009268 to M.L.B.,

864 an administrative supplement to NIH grant R01-ES013768 to B.F.P., an administrative  
865 supplement to NIH grant R01CA214035 to A.S., NIH grant R50CA211428 to E.R.S., and NIH  
866 grant R44 DE029633 to EpiCypher.

867

868

### 869 **Author Contributions**

870 In the Basu lab, G.R. performed STORM experiments; W.Z. performed required bioinformatics  
871 analyses of STORM data; U.B. analyzed data, provided oversight and co-wrote the manuscript.  
872 In the Bulyk lab, J.T.A. and S.K.P. performed cloning, protein expression, western blots, PBM  
873 experiments, and PBM analysis; L.M. performed analysis of motif enrichment and centering;  
874 S.K.P. and L.M. prepared figures and Supplementary Tables; M.L.B. supervised research; and  
875 S.K.P., L.M., and M.L.B. co-wrote the manuscript. In the Pugh lab, TRB, KB, JM, SND, and  
876 KM performed ChIP-exo assays. PK designed and implemented the web portal. MJR and DJ  
877 performed ChIP-exo library quantitation and sequencing. WKML directed the ChIP-exo  
878 experiments, processed and analyzed the ChIP-exo, and co-wrote the manuscript writing. BFP  
879 provided oversight for ChIP-exo and co-wrote the manuscript. In the Shilatifard lab, A.P.S.  
880 conducted experiments. E.R.S. analyzed ChIP-seq data. E.R.S. and A.S. provided oversight and  
881 co-wrote the manuscript. From EpiCypher, B.J.V., K.N. and E.M. performed CUT&RUN  
882 studies, and M-C.K. provided oversight and co-wrote the manuscript.

883

### 884 **Competing Interests**

885 M.L.B. is a co-inventor on U.S. patent #8,530,638 on universal PBM technology. BFP has a  
886 financial interest in Peconic, LLC, which utilizes the ChIP-exo technology implemented in this  
887 study and could potentially benefit from the outcomes of this research. EpiCypher is a  
888 commercial developer of reagents to support CUTANA<sup>®</sup> CUT&RUN. The authors in the Basu  
889 and Shilatifard labs declare no competing financial interests.

890 **REFERENCES**

- 891 Albert I, Wachi S, Jiang C, Pugh BF. 2008. GeneTrack--a genomic data processing and  
892 visualization framework. *Bioinformatics* **24**: 1305-1306.
- 893 Aragon E, Wang Q, Zou Y, Morgani SM, Ruiz L, Kaczmarek Z, Su J, Torner C, Tian L, Hu J et  
894 al. 2019. Structural basis for distinct roles of SMAD2 and SMAD3 in FOXH1 pioneer-  
895 directed TGF-beta signaling. *Genes Dev* **33**: 1506-1524.
- 896 Bailey TL, Boden M, Buske FA, Frith M, Grant CE, Clementi L, Ren J, Li WW, Noble WS.  
897 2009. MEME SUITE: tools for motif discovery and searching. *Nucleic Acids Res* **37**:  
898 W202-208.
- 899 Bailey TL, Machanick P. 2012. Inferring direct DNA binding from ChIP-seq. *Nucleic Acids Res*  
900 **40**: e128.
- 901 Baker M. 2015. Reproducibility crisis: Blame it on the antibodies. *Nature* **521**: 274-276.
- 902 Baler R, Dahl G, Voellmy R. 1993. Activation of human heat shock genes is accompanied by  
903 oligomerization, modification, and rapid translocation of heat shock transcription factor  
904 HSF1. *Mol Cell Biol* **13**: 2486-2496.
- 905 Berger MF, Bulyk ML. 2009. Universal protein-binding microarrays for the comprehensive  
906 characterization of the DNA-binding specificities of transcription factors. *Nat Protoc* **4**:  
907 393-411.
- 908 Berger MF, Philippakis AA, Qureshi AM, He FS, Estep PW, 3rd, Bulyk ML. 2006. Compact,  
909 universal DNA microarrays to comprehensively determine transcription-factor binding  
910 site specificities. *Nat Biotechnol* **24**: 1429-1435.
- 911 Betzig E, Patterson GH, Sougrat R, Lindwasser OW, Olenych S, Bonifacino JS, Davidson MW,  
912 Lippincott-Schwartz J, Hess HF. 2006. Imaging intracellular fluorescent proteins at  
913 nanometer resolution. *Science* **313**: 1642-1645.
- 914 Blackshaw S, Venkataraman A, Irizarry J, Yang K, Anderson S, Campbell E, Gatlin CL,  
915 Freeman NL, Basavappa R, Stewart R et al. 2016. The NIH Protein Capture Reagents  
916 Program (PCRP): a standardized protein affinity reagent toolbox. *Nat Methods* **13**: 805-  
917 806.
- 918 Castro-Mondragon JA, Jaeger S, Thieffry D, Thomas-Chollier M, van Helden J. 2017. RSAT  
919 matrix-clustering: dynamic exploration and redundancy reduction of transcription factor  
920 binding motif collections. *Nucleic Acids Res* **45**: e119.
- 921 Chames P, Van Regenmortel M, Weiss E, Baty D. 2009. Therapeutic antibodies: successes,  
922 limitations and hopes for the future. *Br J Pharmacol* **157**: 220-233.
- 923 Collaboration OR. 2016. The ORFeome Collaboration: a genome-scale human ORF-clone  
924 resource. *Nat Methods* **13**: 191-192.
- 925 Consortium TEP. 2012. An integrated encyclopedia of DNA elements in the human genome.  
926 *Nature* **489**: 57-74.
- 927 Edfors F, Hober A, Linderback K, Maddalo G, Azimi A, Sivertsson A, Tegel H, Hober S,  
928 Szigartyo CA, Fagerberg L et al. 2018. Enhanced validation of antibodies for research  
929 applications. *Nat Commun* **9**: 4130.
- 930 Egelhofer TA, Minoda A, Klugman S, Lee K, Kolasinska-Zwierz P, Alekseyenko AA, Cheung  
931 MS, Day DS, Gadel S, Gorchakov AA et al. 2011. An assessment of histone-modification  
932 antibody quality. *Nat Struct Mol Biol* **18**: 91-93.
- 933 Engelen E, Brandsma JH, Moen MJ, Signorile L, Dekkers DH, Demmers J, Kockx CE, Ozgur Z,  
934 van IWF, van den Berg DL et al. 2015. Proteins that bind regulatory regions identified by  
935 histone modification chromatin immunoprecipitations and mass spectrometry. *Nat*  
936 *Commun* **6**: 7155.

- 937 Ernst J, Kheradpour P, Mikkelsen TS, Shoresh N, Ward LD, Epstein CB, Zhang X, Wang L,  
938 Issner R, Coyne M et al. 2011. Mapping and analysis of chromatin state dynamics in nine  
939 human cell types. *Nature* **473**: 43-49.
- 940 Fornes O, Castro-Mondragon JA, Khan A, van der Lee R, Zhang X, Richmond PA, Modi BP,  
941 Correard S, Gheorghe M, Baranasic D et al. 2020. JASPAR 2020: update of the open-  
942 access database of transcription factor binding profiles. *Nucleic Acids Res* **48**: D87-D92.
- 943 Gordan R, Hartemink AJ, Bulyk ML. 2009. Distinguishing direct versus indirect transcription  
944 factor-DNA interactions. *Genome Res* **19**: 2090-2100.
- 945 Gupta S, Stamatoyannopoulos JA, Bailey TL, Noble WS. 2007. Quantifying similarity between  
946 motifs. *Genome Biol* **8**: R24.
- 947 Hanly WC, Artwohl JE, Bennett BT. 1995. Review of Polyclonal Antibody Production  
948 Procedures in Mammals and Poultry. *ILAR J* **37**: 93-118.
- 949 Hoffman MM, Buske OJ, Wang J, Weng Z, Bilmes JA, Noble WS. 2012. Unsupervised pattern  
950 discovery in human chromatin structure through genomic segmentation. *Nat Methods* **9**:  
951 473-476.
- 952 Hoffman MM, Ernst J, Wilder SP, Kundaje A, Harris RS, Libbrecht M, Giardine B, Ellenbogen  
953 PM, Bilmes JA, Birney E et al. 2013. Integrative annotation of chromatin elements from  
954 ENCODE data. *Nucleic Acids Res* **41**: 827-841.
- 955 Hume MA, Barrera LA, Gisselbrecht SS, Bulyk ML. 2015. UniPROBE, update 2015: new tools  
956 and content for the online database of protein-binding microarray data on protein-DNA  
957 interactions. *Nucleic Acids Res* **43**: D117-122.
- 958 Kohler G, Milstein C. 1975. Continuous cultures of fused cells secreting antibody of predefined  
959 specificity. *Nature* **256**: 495-497.
- 960 Landt SG, Marinov GK, Kundaje A, Kheradpour P, Pauli F, Batzoglou S, Bernstein BE, Bickel  
961 P, Brown JB, Cayting P et al. 2012. ChIP-seq guidelines and practices of the ENCODE  
962 and modENCODE consortia. *Genome Res* **22**: 1813-1831.
- 963 Langmead B, Trapnell C, Pop M, Salzberg SL. 2009. Ultrafast and memory-efficient alignment  
964 of short DNA sequences to the human genome. *Genome Biol* **10**: R25.
- 965 Lee TI, Johnstone SE, Young RA. 2006. Chromatin immunoprecipitation and microarray-based  
966 analysis of protein location. *Nat Protoc* **1**: 729-748.
- 967 Liang K, Keles S. 2012. Normalization of ChIP-seq data with control. *BMC Bioinformatics* **13**:  
968 199.
- 969 Lim J, Giri PK, Kazadi D, Laffleur B, Zhang W, Grinstein V, Pefanis E, Brown LM, Ladewig E,  
970 Martin O et al. 2017. Nuclear Proximity of Mtr4 to RNA Exosome Restricts DNA  
971 Mutational Asymmetry. *Cell* **169**: 523-537 e515.
- 972 Lin JR, Fallahi-Sichani M, Sorger PK. 2015. Highly multiplexed imaging of single cells using a  
973 high-throughput cyclic immunofluorescence method. *Nat Commun* **6**: 8390.
- 974 Liu JK. 2014. The history of monoclonal antibody development - Progress, remaining challenges  
975 and future innovations. *Ann Med Surg (Lond)* **3**: 113-116.
- 976 Liu N, Hargreaves VV, Zhu Q, Kurland JV, Hong J, Kim W, Sher F, Macias-Trevino C, Rogers  
977 JM, Kurita R et al. 2018. Direct Promoter Repression by BCL11A Controls the Fetal to  
978 Adult Hemoglobin Switch. *Cell* **173**: 430-442 e417.
- 979 Mahmood T, Yang PC. 2012. Western blot: technique, theory, and trouble shooting. *N Am J Med*  
980 *Sci* **4**: 429-434.
- 981 Mariani L, Weinand K, Vedenko A, Barrera LA, Bulyk ML. 2017. Identification of Human  
982 Lineage-Specific Transcriptional Coregulators Enabled by a Glossary of Binding  
983 Modules and Tunable Genomic Backgrounds. *Cell Syst* **5**: 187-201 e187.

- 984 Mariani L, Weinand, K., Gisselbrecht, S.S. & Bulyk, M.L. 2020. MEDEA: Analysis of  
985 Transcription Factor Binding Motifs in Accessible Chromatin. *Genome Res In Press*.
- 986 Marx V. 2019. What to do about those immunoprecipitation blues. *Nat Methods* **16**: 289-292.
- 987 Mukherjee S, Berger MF, Jona G, Wang XS, Muzzey D, Snyder M, Young RA, Bulyk ML.  
988 2004. Rapid analysis of the DNA-binding specificities of transcription factors with DNA  
989 microarrays. *Nat Genet* **36**: 1331-1339.
- 990 Nakagawa S, Gisselbrecht SS, Rogers JM, Hartl DL, Bulyk ML. 2013. DNA-binding specificity  
991 changes in the evolution of forkhead transcription factors. *Proc Natl Acad Sci U S A* **110**:  
992 12349-12354.
- 993 Park PJ. 2009. ChIP-seq: advantages and challenges of a maturing technology. *Nat Rev Genet*  
994 **10**: 669-680.
- 995 Rada-Iglesias A, Ameer A, Kapranov P, Enroth S, Komorowski J, Gingeras TR, Wadelius C.  
996 2008. Whole-genome maps of USF1 and USF2 binding and histone H3 acetylation reveal  
997 new aspects of promoter structure and candidate genes for common human disorders.  
998 *Genome Res* **18**: 380-392.
- 999 Ramirez F, Ryan DP, Gruning B, Bhardwaj V, Kilpert F, Richter AS, Heyne S, Dundar F,  
1000 Manke T. 2016. deepTools2: a next generation web server for deep-sequencing data  
1001 analysis. *Nucleic Acids Res* **44**: W160-165.
- 1002 Reardon S. 2016. Thousands of goats and rabbits vanish from major biotech lab. In *Nature*.
- 1003 Rhee HS, Pugh BF. 2011. Comprehensive genome-wide protein-DNA interactions detected at  
1004 single-nucleotide resolution. *Cell* **147**: 1408-1419.
- 1005 Rhee HS, Pugh BF. 2012. ChIP-exo method for identifying genomic location of DNA-binding  
1006 proteins with near-single-nucleotide accuracy. *Curr Protoc Mol Biol* **Chapter 21**: Unit  
1007 21 24.
- 1008 Roadmap Epigenomics C, Kundaje A, Meuleman W, Ernst J, Bilenky M, Yen A, Heravi-  
1009 Moussavi A, Kheradpour P, Zhang Z, Wang J et al. 2015. Integrative analysis of 111  
1010 reference human epigenomes. *Nature* **518**: 317-330.
- 1011 Rohs R, West SM, Sosinsky A, Liu P, Mann RS, Honig B. 2009. The role of DNA shape in  
1012 protein-DNA recognition. *Nature* **461**: 1248-1253.
- 1013 Rossi MJ, Lai WKM, Pugh BF. 2018. Simplified ChIP-exo assays. *Nat Commun* **9**: 2842.
- 1014 Shah RN, Grzybowski AT, Cornett EM, Johnstone AL, Dickson BM, Boone BA, Cheek MA,  
1015 Cowles MW, Maryanski D, Meiners MJ et al. 2018. Examining the Roles of H3K4  
1016 Methylation States with Systematically Characterized Antibodies. *Mol Cell* **72**: 162-177  
1017 e167.
- 1018 Siggers T, Chang AB, Teixeira A, Wong D, Williams KJ, Ahmed B, Ragoussis J, Udalova IA,  
1019 Smale ST, Bulyk ML. 2011a. Principles of dimer-specific gene regulation revealed by a  
1020 comprehensive characterization of NF-kappaB family DNA binding. *Nat Immunol* **13**:  
1021 95-102.
- 1022 Siggers T, Duyzend MH, Reddy J, Khan S, Bulyk ML. 2011b. Non-DNA-binding cofactors  
1023 enhance DNA-binding specificity of a transcriptional regulatory complex. *Mol Syst Biol*  
1024 **7**: 555.
- 1025 Sikorski K, Mehta A, Inngjerdigen M, Thakor F, Kling S, Kalina T, Nyman TA, Stensland ME,  
1026 Zhou W, de Souza GA et al. 2018. A high-throughput pipeline for validation of  
1027 antibodies. *Nat Methods* **15**: 909-912.
- 1028 Skene PJ, Henikoff JG, Henikoff S. 2018. Targeted in situ genome-wide profiling with high  
1029 efficiency for low cell numbers. *Nat Protoc* **13**: 1006-1019.
- 1030 Son KK, Tkach D, Rosenblatt J. 2001. Delipidated serum abolishes the inhibitory effect of serum  
1031 on in vitro liposome-mediated transfection. *Biochim Biophys Acta* **1511**: 201-205.

- 1032 Su J, Morgani SM, David CJ, Wang Q, Er EE, Huang YH, Basnet H, Zou Y, Shu W, Soni RK et  
1033 al. 2020. TGF-beta orchestrates fibrogenic and developmental EMTs via the RAS  
1034 effector RREB1. *Nature* **577**: 566-571.
- 1035 Trescher S, Leser U. 2019. Estimation of Transcription Factor Activity in Knockdown Studies.  
1036 *Sci Rep* **9**: 9593.
- 1037 Uhlen M, Bandrowski A, Carr S, Edwards A, Ellenberg J, Lundberg E, Rimm DL, Rodriguez H,  
1038 Hiltke T, Snyder M et al. 2016. A proposal for validation of antibodies. *Nat Methods* **13**:  
1039 823-827.
- 1040 Uhlen M, Bjorling E, Agaton C, Szigyarto CA, Amini B, Andersen E, Andersson AC, Angelidou  
1041 P, Asplund A, Asplund C et al. 2005. A human protein atlas for normal and cancer tissues  
1042 based on antibody proteomics. *Mol Cell Proteomics* **4**: 1920-1932.
- 1043 Venkataraman A, Yang K, Irizarry J, Mackiewicz M, Mita P, Kuang Z, Xue L, Ghosh D, Liu S,  
1044 Ramos P et al. 2018. A toolbox of immunoprecipitation-grade monoclonal antibodies to  
1045 human transcription factors. *Nat Methods* doi:10.1038/nmeth.4632.
- 1046 Wang J, Zhuang J, Iyer S, Lin X, Whitfield TW, Greven MC, Pierce BG, Dong X, Kundaje A,  
1047 Cheng Y et al. 2012. Sequence features and chromatin structure around the genomic  
1048 regions bound by 119 human transcription factors. *Genome Res* **22**: 1798-1812.
- 1049 Wardle FC, Tan H. 2015. A ChIP on the shoulder? Chromatin immunoprecipitation and  
1050 validation strategies for ChIP antibodies. *F1000Res* **4**: 235.
- 1051 Weirauch MT, Yang A, Albu M, Cote AG, Montenegro-Montero A, Drewe P, Najafabadi HS,  
1052 Lambert SA, Mann I, Cook K et al. 2014. Determination and inference of eukaryotic  
1053 transcription factor sequence specificity. *Cell* **158**: 1431-1443.
- 1054 Winter G, Griffiths AD, Hawkins RE, Hoogenboom HR. 1994. Making antibodies by phage  
1055 display technology. *Annu Rev Immunol* **12**: 433-455.
- 1056 Workman CT, Yin Y, Corcoran DL, Ideker T, Stormo GD, Benos PV. 2005. enoLOGOS: a  
1057 versatile web tool for energy normalized sequence logos. *Nucleic Acids Res* **33**: W389-  
1058 392.
- 1059 Yamada N, Lai WKM, Farrell N, Pugh BF, Mahony S. 2019. Characterizing protein-DNA  
1060 binding event subtypes in ChIP-exo data. *Bioinformatics* **35**: 903-913.
- 1061 Zhang Y, Liu T, Meyer CA, Eeckhoute J, Johnson DS, Bernstein BE, Nusbaum C, Myers RM,  
1062 Brown M, Li W et al. 2008. Model-based analysis of ChIP-Seq (MACS). *Genome Biol* **9**:  
1063 R137.
- 1064

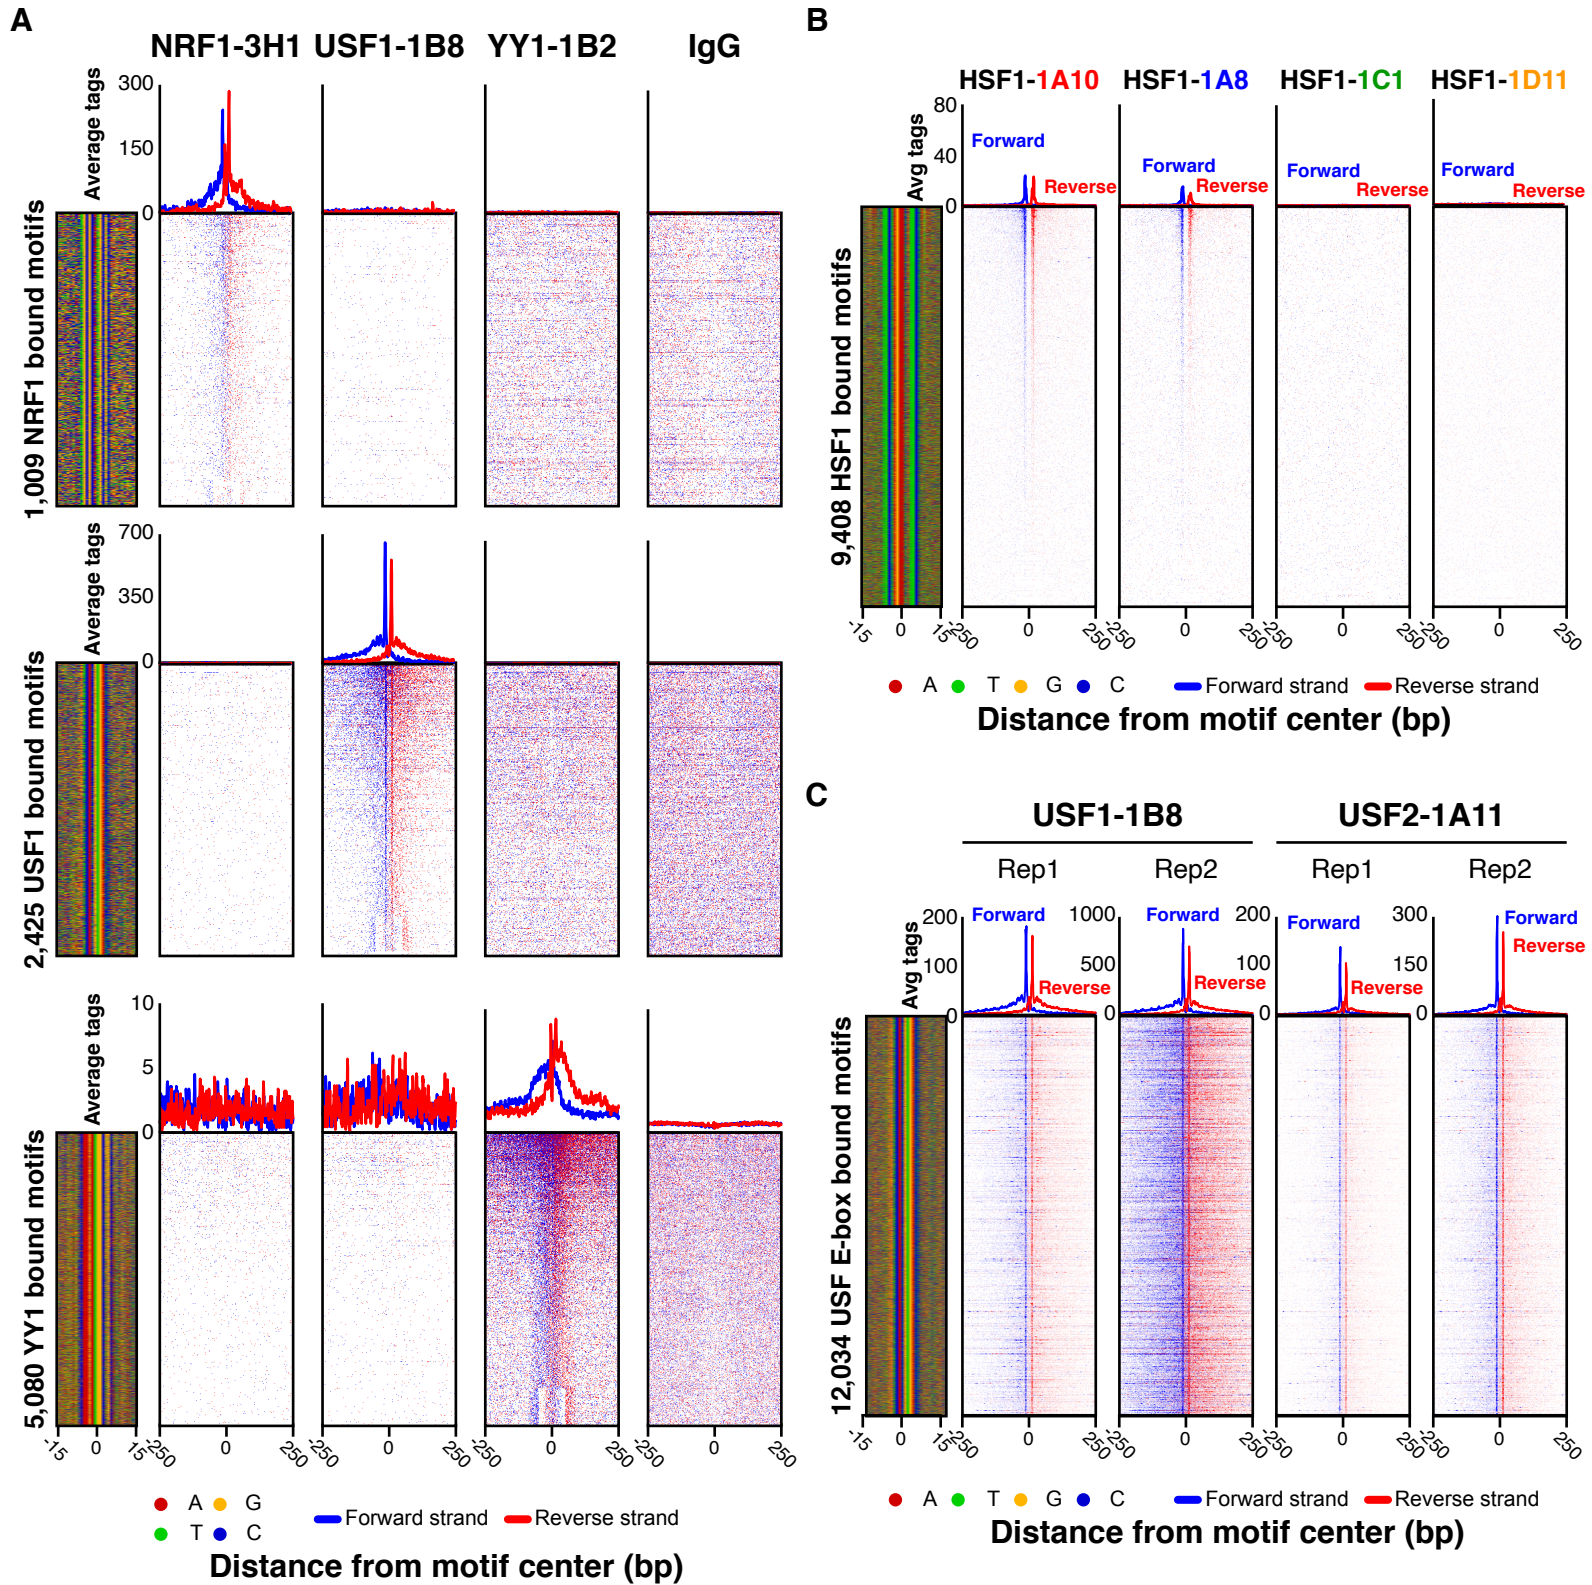



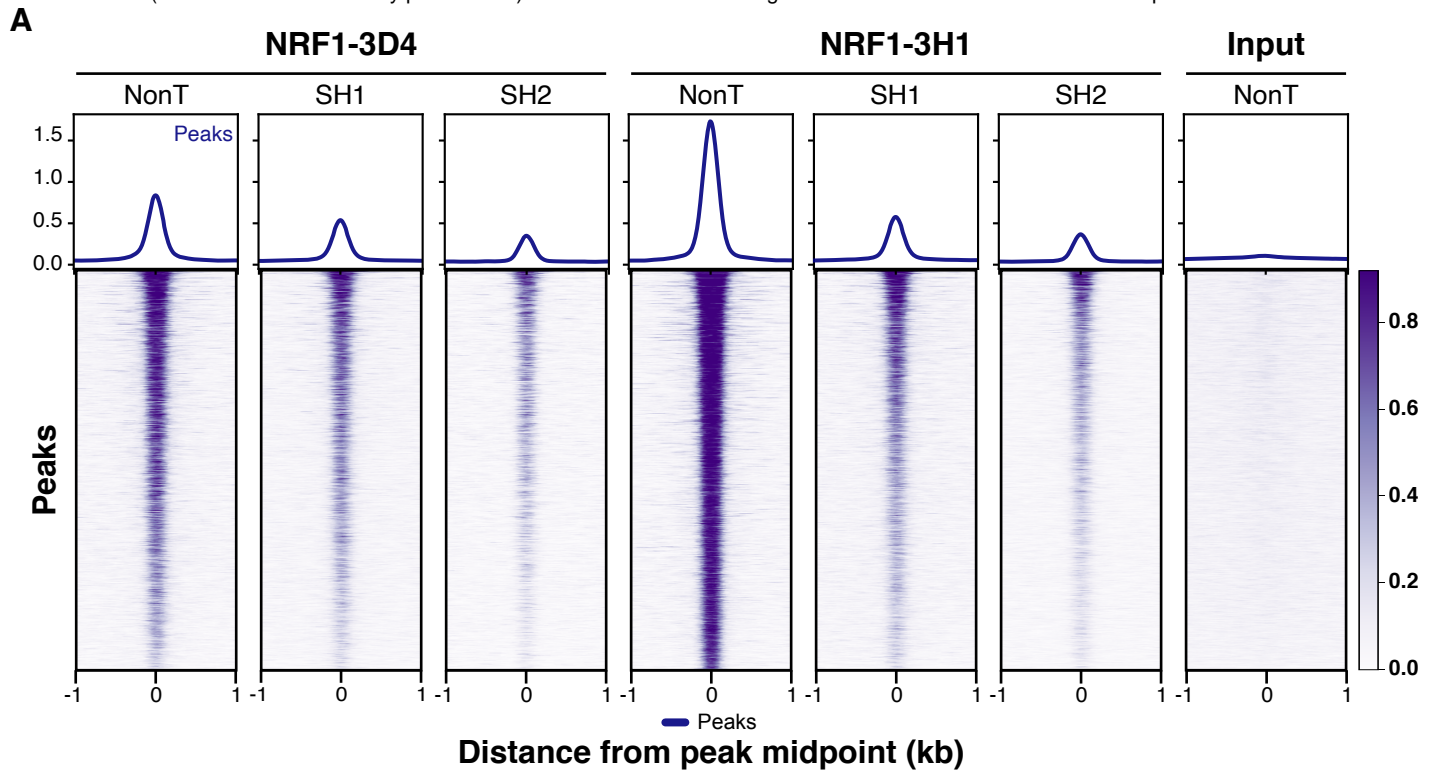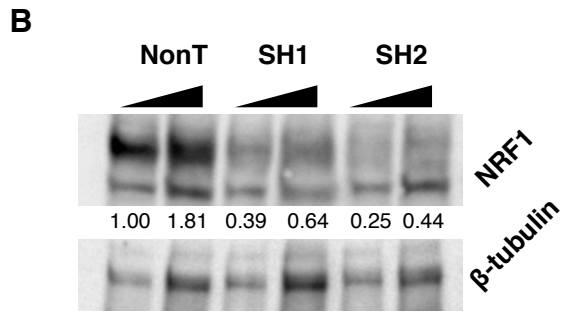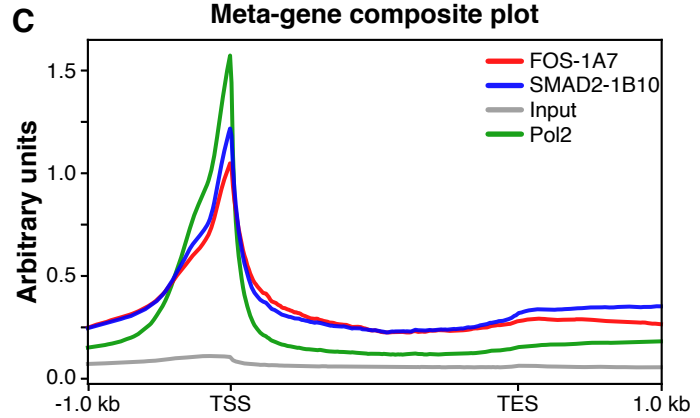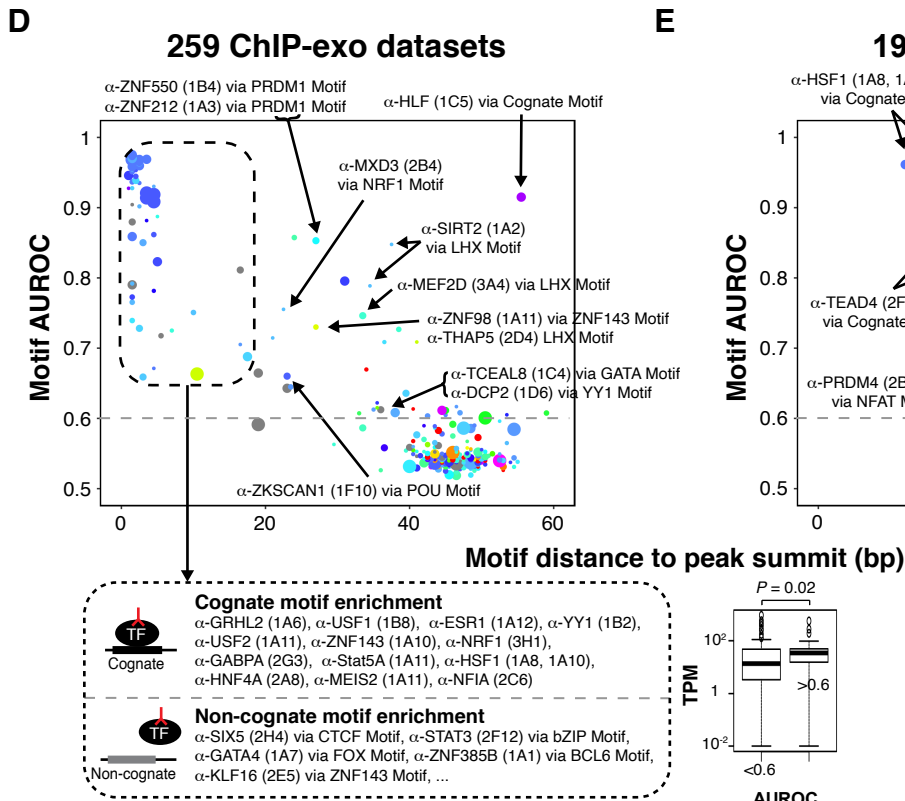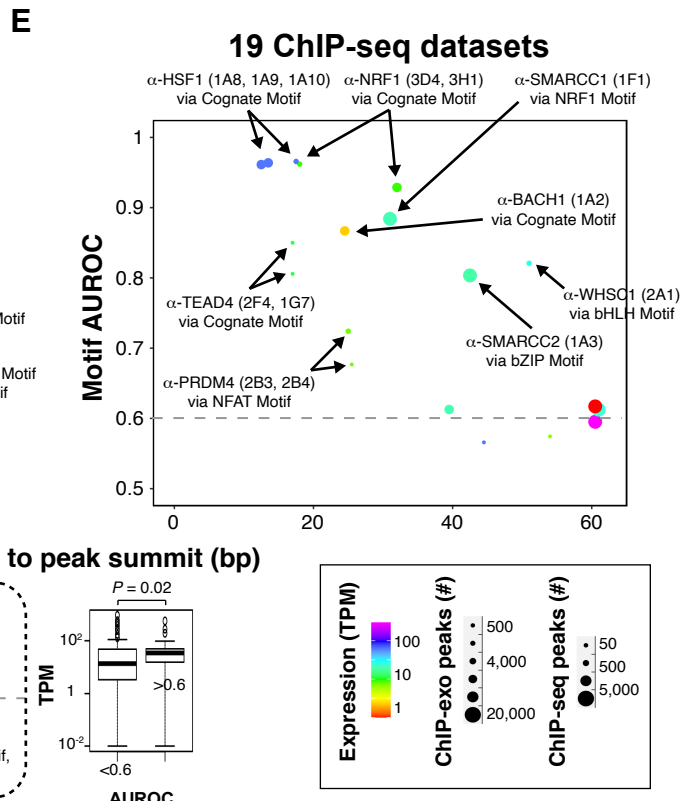

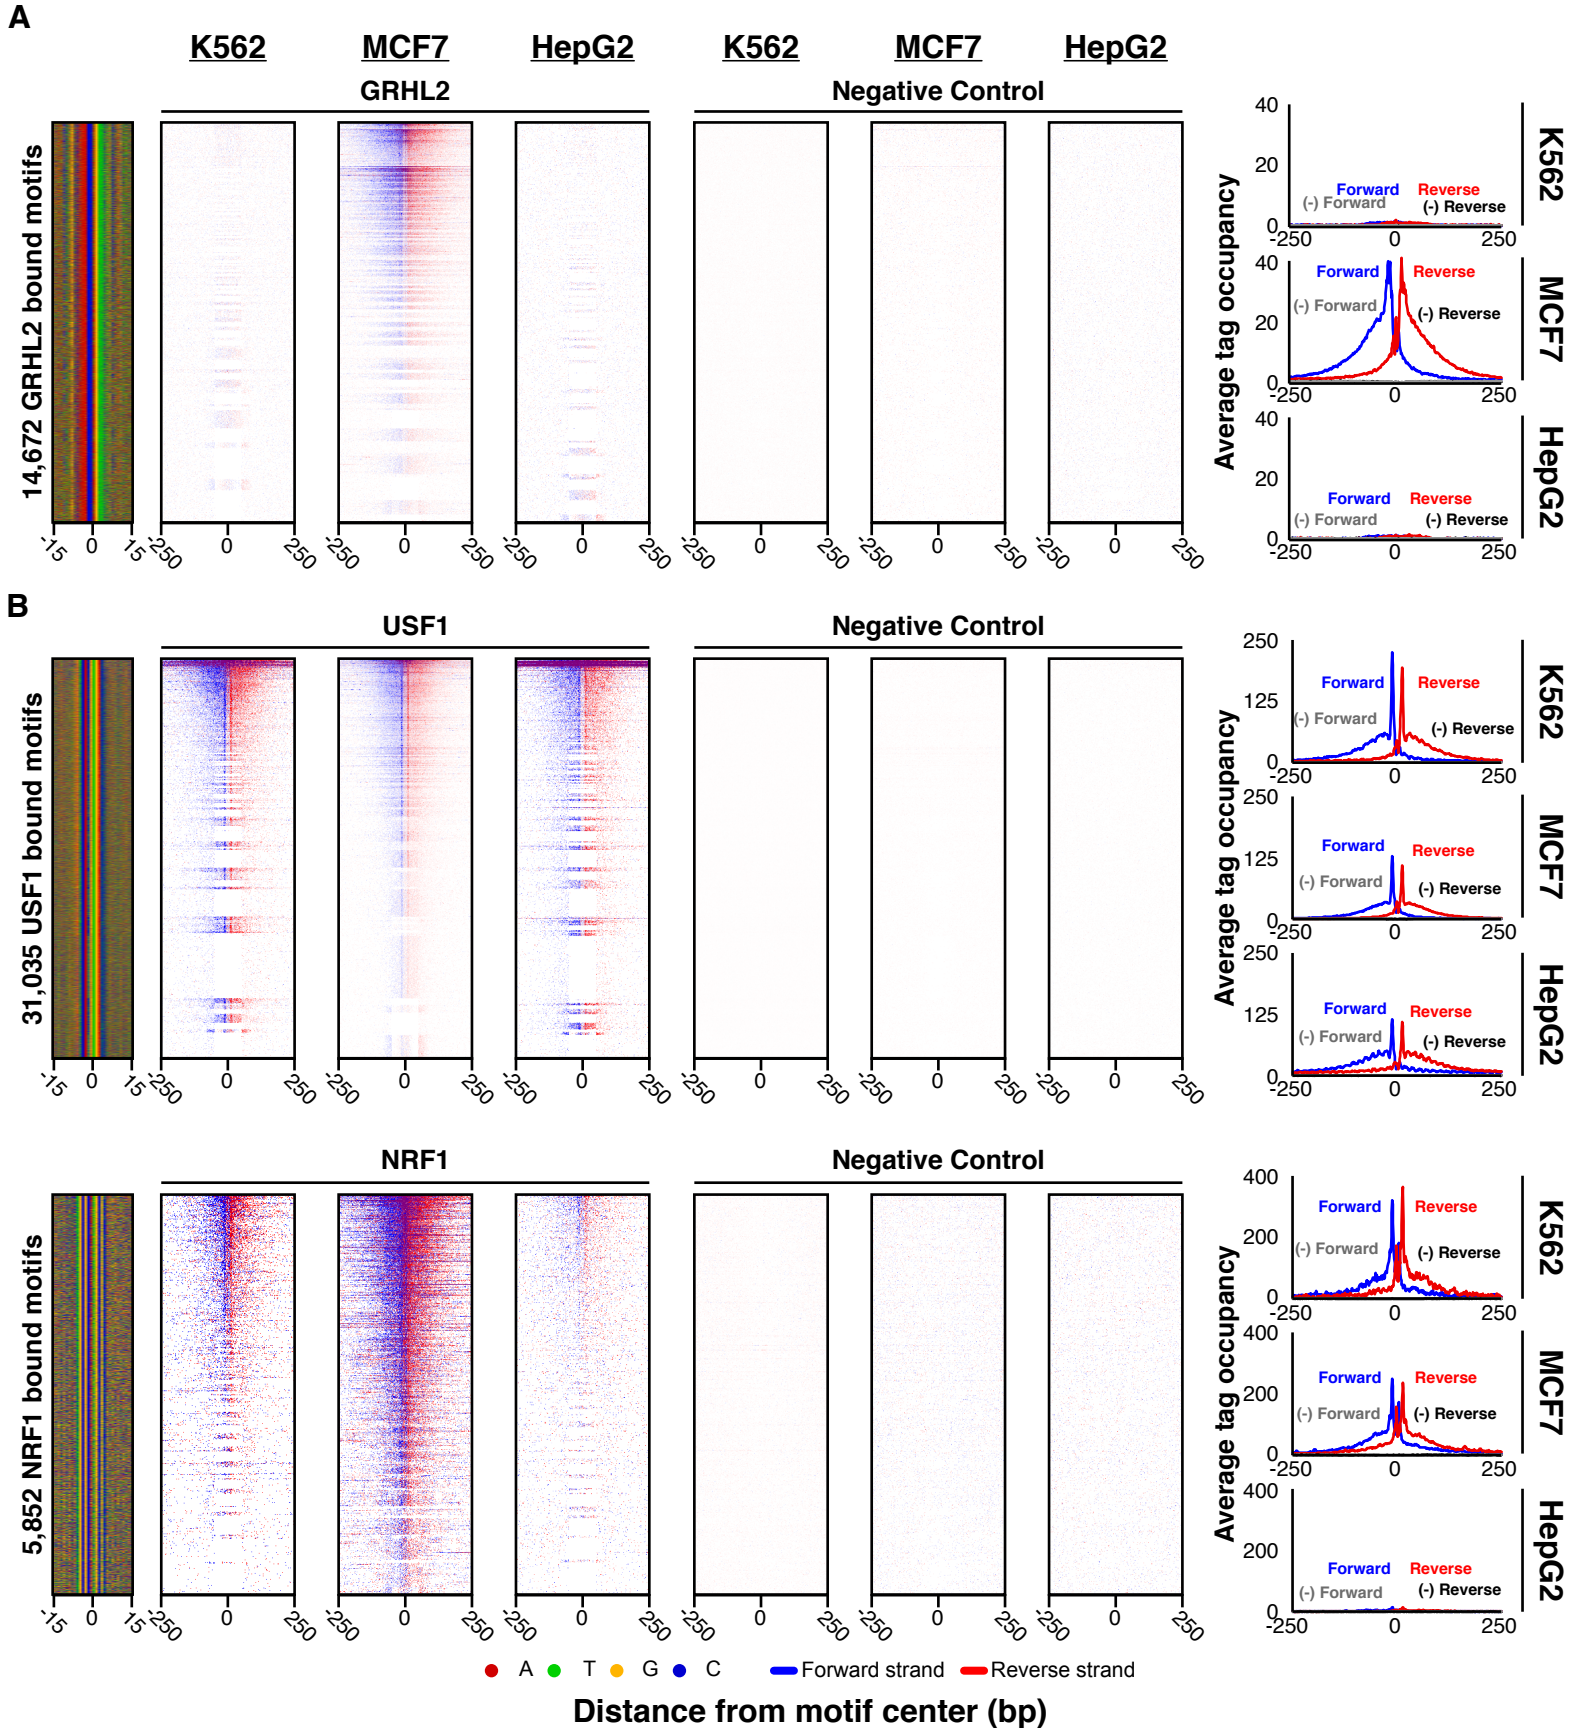

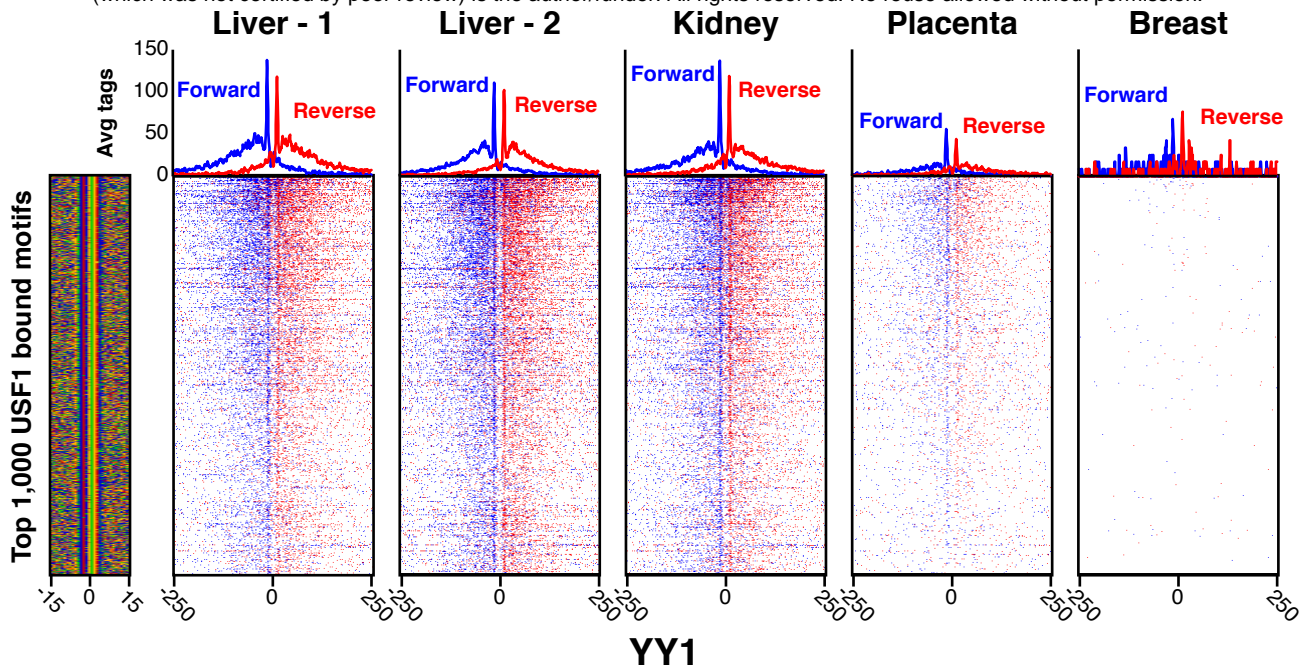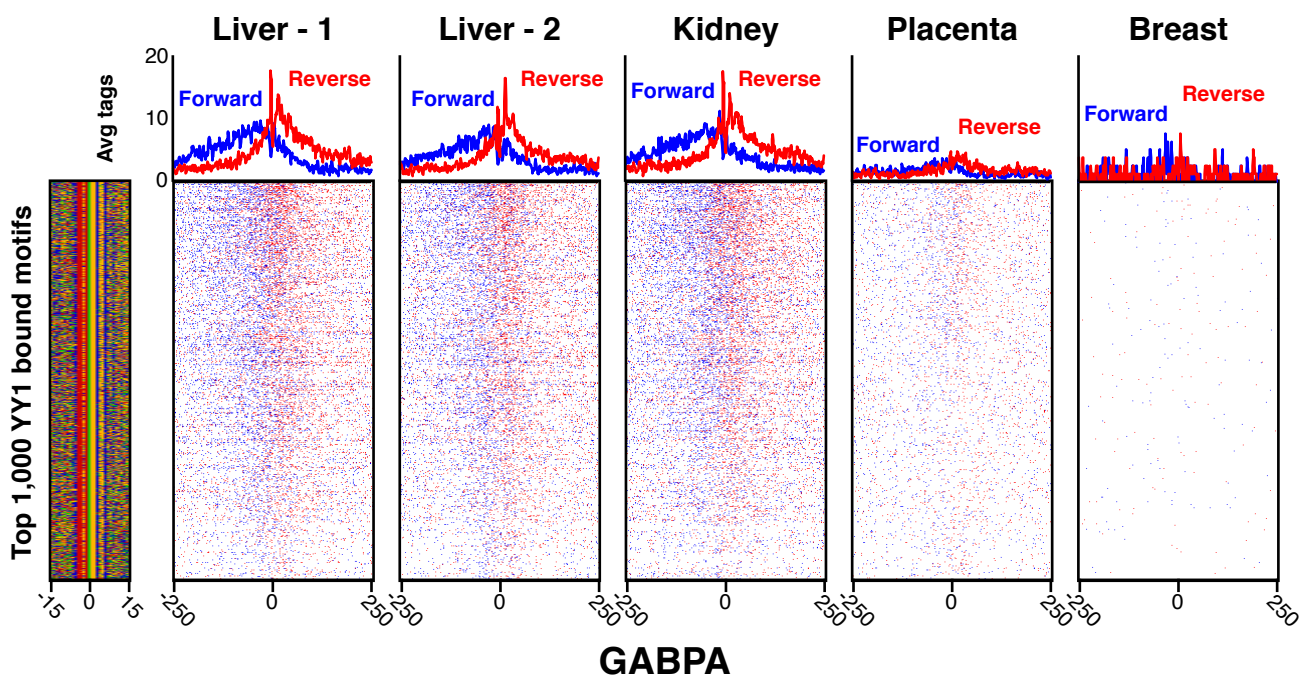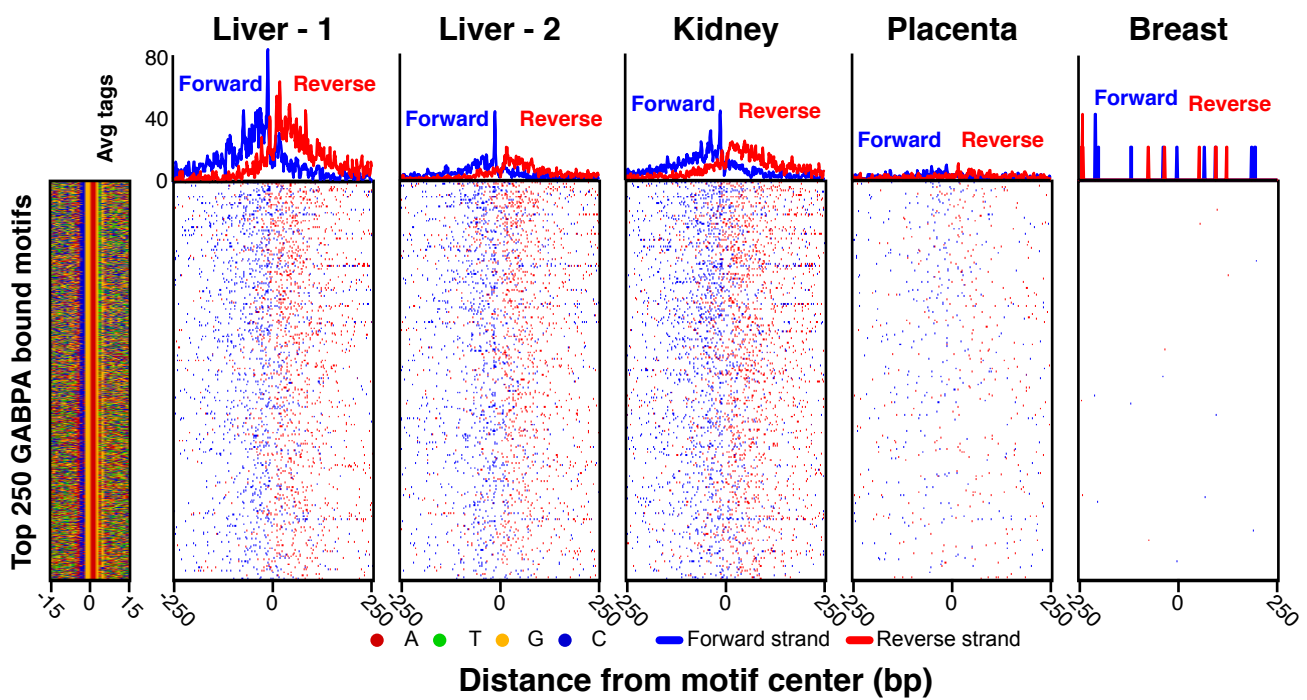

**A**

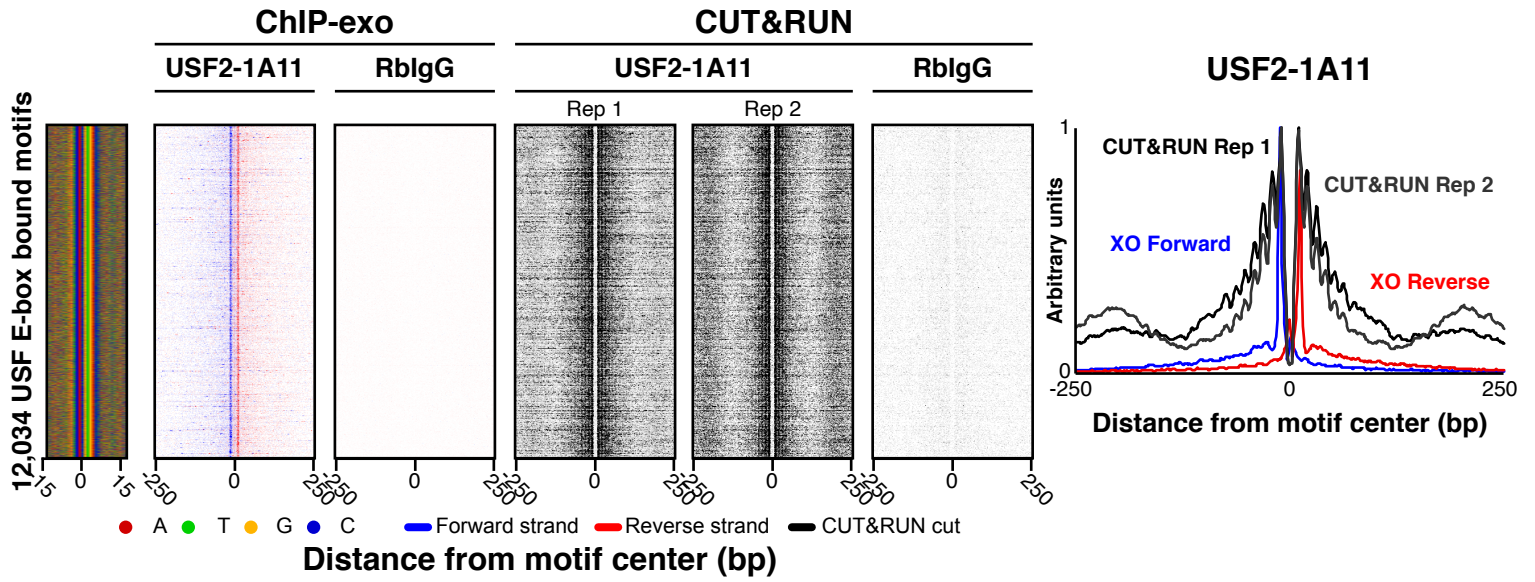

**B**

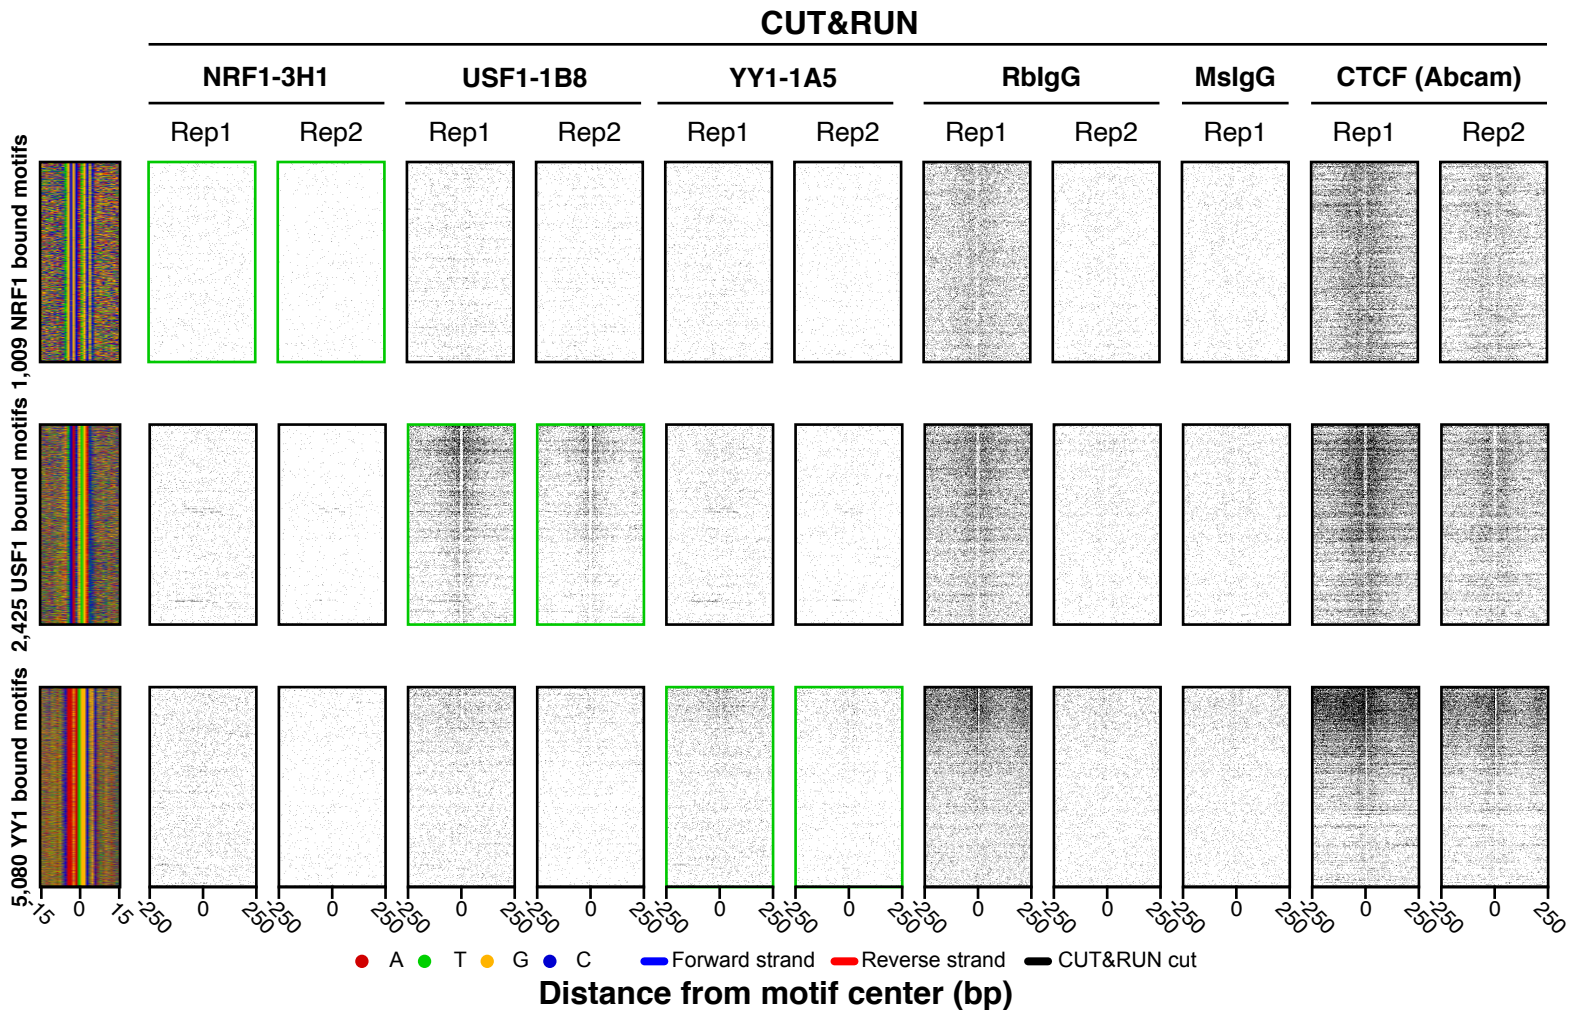

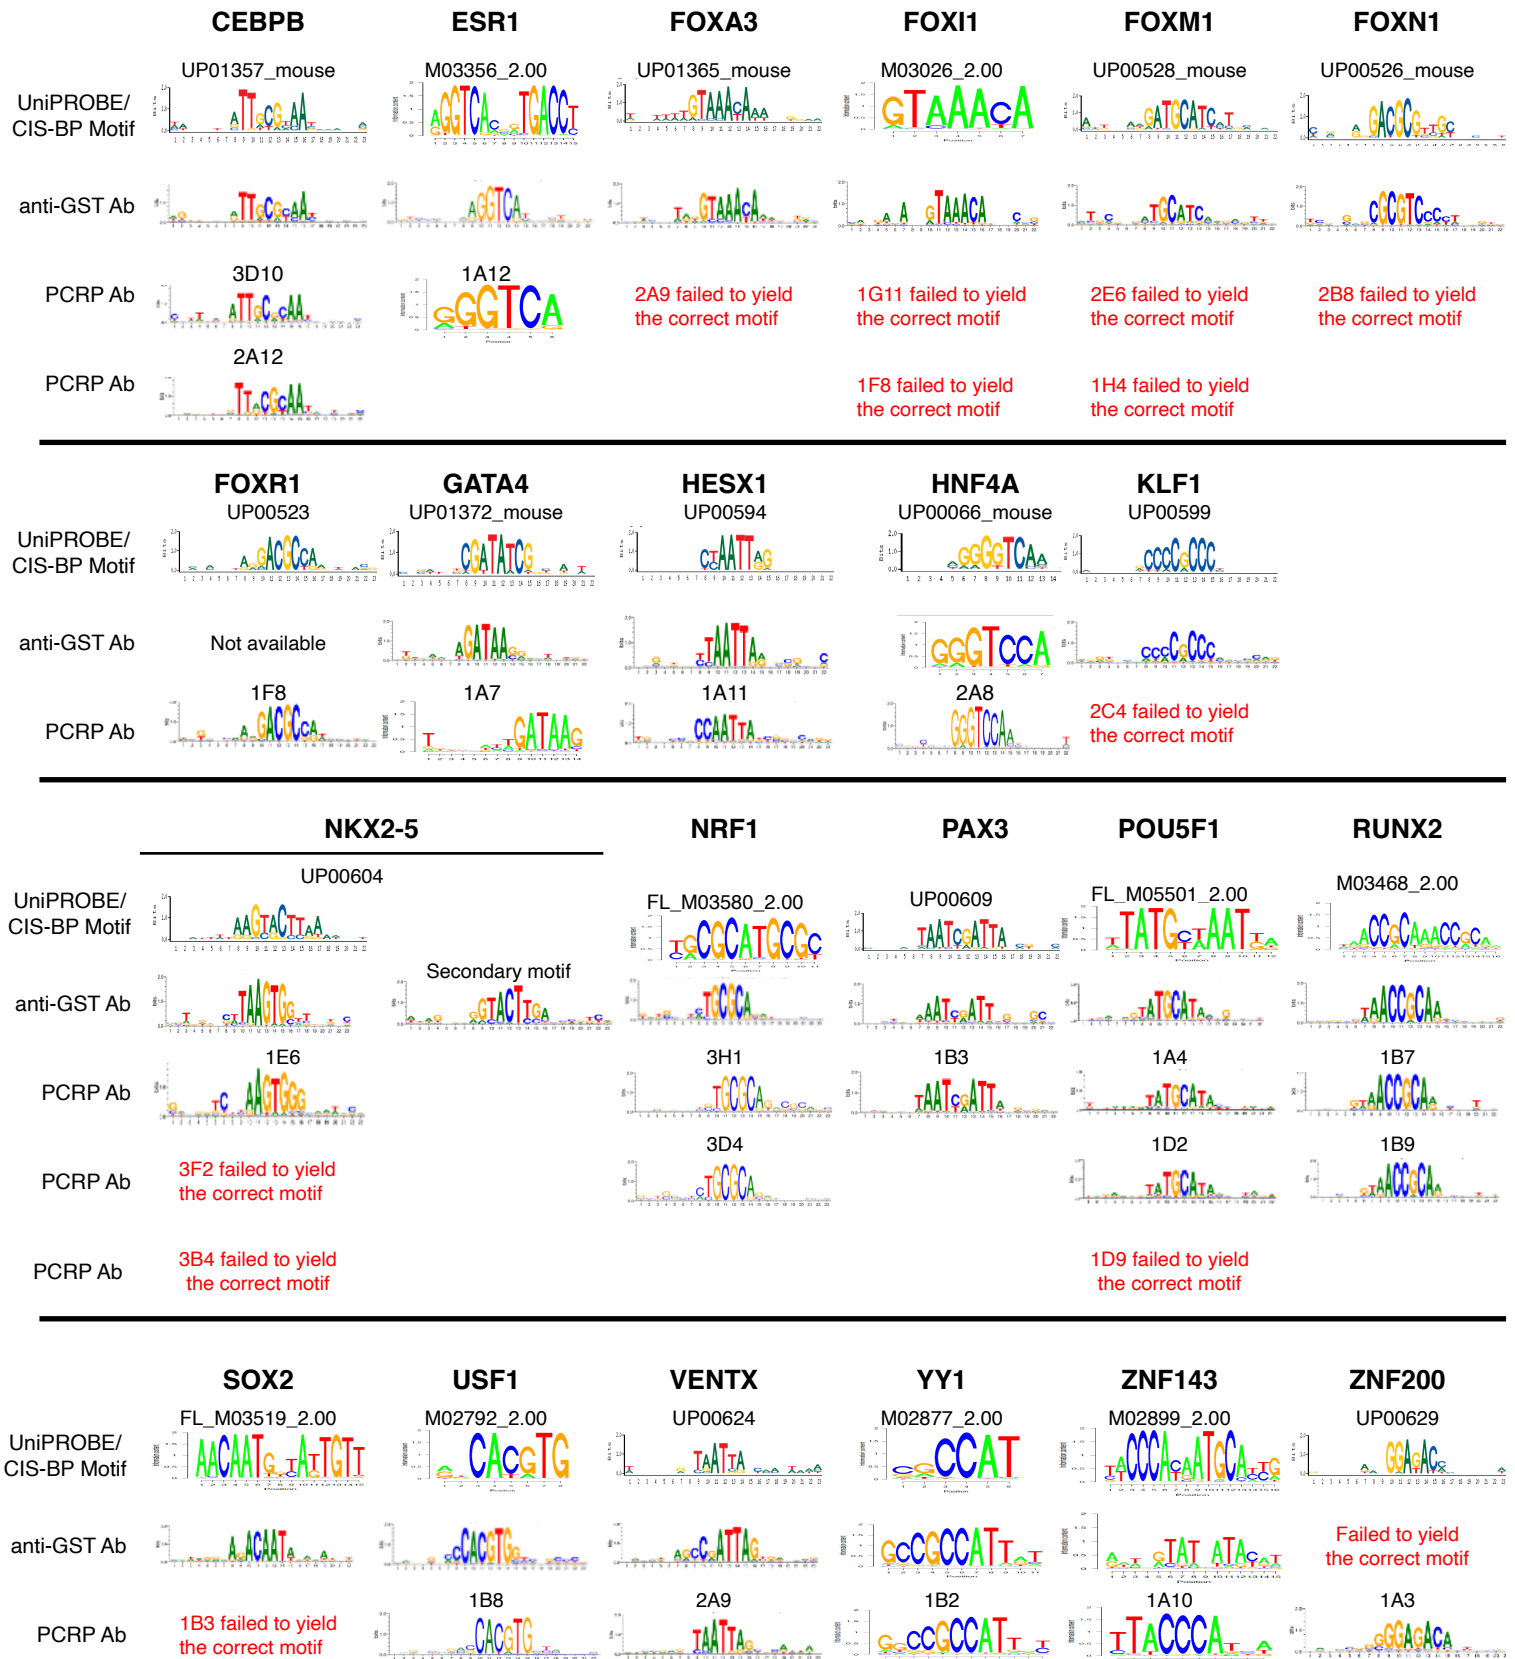

Source: https://www.biorxiv.org/content/biorxiv/early/2021/03/03/2020.06.08.140046.full.pdf
